# Supplementary material for: New Tricholomalides D–G from the Mushroom Tricholoma ustaloides Grown in an Italian Beech Wood
Source: MDPI journal article supplement (doi:10.3390/molecules28217446), 2023-11-06
Supplement: s1 [file s1]

## SUPPLEMENTARY INFORMATION

### New Tricholomalides D-G from the Mushroom *Tricholoma ustaloides* Grown in an Italian Beech Wood

Gianluca Gilardoni <sup>1</sup>, Francesca Negri <sup>2</sup>, Paola Vita Finzi <sup>2</sup>, Faiq H. S. Hussain <sup>3</sup>, and Giovanni Vidari <sup>2,3,\*</sup>

<sup>1</sup> Departamento de Química, Universidad Técnica Particular de Loja (UTPL), Loja 110107, Ecuador; ggilardoni@utpl.edu.ec or gianluca.gilardoni@gmail.com (G.G.)

<sup>2</sup> Dipartimento di Chimica, Università degli Studi di Pavia, Via Taramelli 10, 27100 Pavia, Italy; f.negri@mail.com (F.N.); paola.vitafinzi@unipv.it (P.V.F.)

<sup>3</sup> Department of Medical Analysis, Faculty of Applied Science, Tishk International University, Erbil 44001, Iraq; faiq.hussain@tiu.edu.iq (F.H.S.H.)

\* Correspondence: vidari@unipv.it (G.V.)

page

|                                                                  |    |
|------------------------------------------------------------------|----|
| S1. <sup>1</sup> H NMR spectrum of Tricholomalide C (17).        | 3  |
| S2. <sup>13</sup> C NMR spectrum of Tricholomalide C (17).       | 4  |
| S3. DEPT <sup>13</sup> C NMR spectrum of Tricholomalide C (17).  | 5  |
| S4. CD spectrum of Tricholomalide C (17).                        | 6  |
| S5. <sup>1</sup> H NMR spectrum of Tricholomalide D (24).        | 7  |
| S6. COSY spectrum of Tricholomalide D (24).                      | 8  |
| S7. <sup>13</sup> C NMR spectrum of Tricholomalide D (24).       | 9  |
| S8. DEPT <sup>13</sup> C NMR spectrum of Tricholomalide D (24).  | 10 |
| S9. EIMS spectrum of Tricholomalide D (24).                      | 11 |
| S10. CD spectrum of Tricholomalide D (24).                       | 12 |
| S11. <sup>1</sup> H NMR spectrum of Tricholomalide E (25).       | 13 |
| S12. COSY spectrum of Tricholomalide E (25).                     | 14 |
| S13. <sup>13</sup> C NMR spectrum of Tricholomalide E (25).      | 15 |
| S14. DEPT <sup>13</sup> C NMR spectrum of Tricholomalide E (25). | 16 |

|                                                                                                         |    |
|---------------------------------------------------------------------------------------------------------|----|
| S15. EIMS spectrum of Tricholomalide E ( <b>27</b> ).                                                   | 17 |
| S16. CD spectrum of Tricholomalide E ( <b>27</b> ).                                                     | 18 |
| S17. $^1\text{H}$ NMR spectrum of Tricholomalide F ( <b>28</b> ).                                       | 19 |
| S18. COSY spectrum of Tricholomalide F ( <b>28</b> ).                                                   | 20 |
| S19. $^{13}\text{C}$ NMR spectrum of Tricholomalide F ( <b>28</b> ).                                    | 21 |
| S20. DEPT $^{13}\text{C}$ NMR spectrum of Tricholomalide F ( <b>28</b> ).                               | 22 |
| S21. EIMS spectrum of Tricholomalide F ( <b>28</b> ).                                                   | 23 |
| S22. CD spectrum of Tricholomalide F ( <b>28</b> ).                                                     | 24 |
| S23. $^1\text{H}$ NMR spectrum of Tricholomalide G ( <b>29</b> ).                                       | 25 |
| S24. COSY spectrum of Tricholomalide G ( <b>29</b> ).                                                   | 26 |
| S25. $^{13}\text{C}$ NMR spectrum of Tricholomalide G ( <b>29</b> ).                                    | 27 |
| S26. DEPT $^{13}\text{C}$ NMR spectrum of Tricholomalide G ( <b>29</b> ).                               | 28 |
| S27. EIMS spectrum of Tricholomalide G ( <b>29</b> ).                                                   | 29 |
| S28. CD spectrum of Tricholomalide G ( <b>29</b> ).                                                     | 30 |
| S29 Table 1. NMR spectral data for compounds <b>26</b> , <b>27</b> , and <b>29</b> in $\text{CDCl}_3$ . | 31 |
| S30. Table 2. NMR spectral data for compound <b>28</b> in $\text{CDCl}_3$ .                             | 32 |

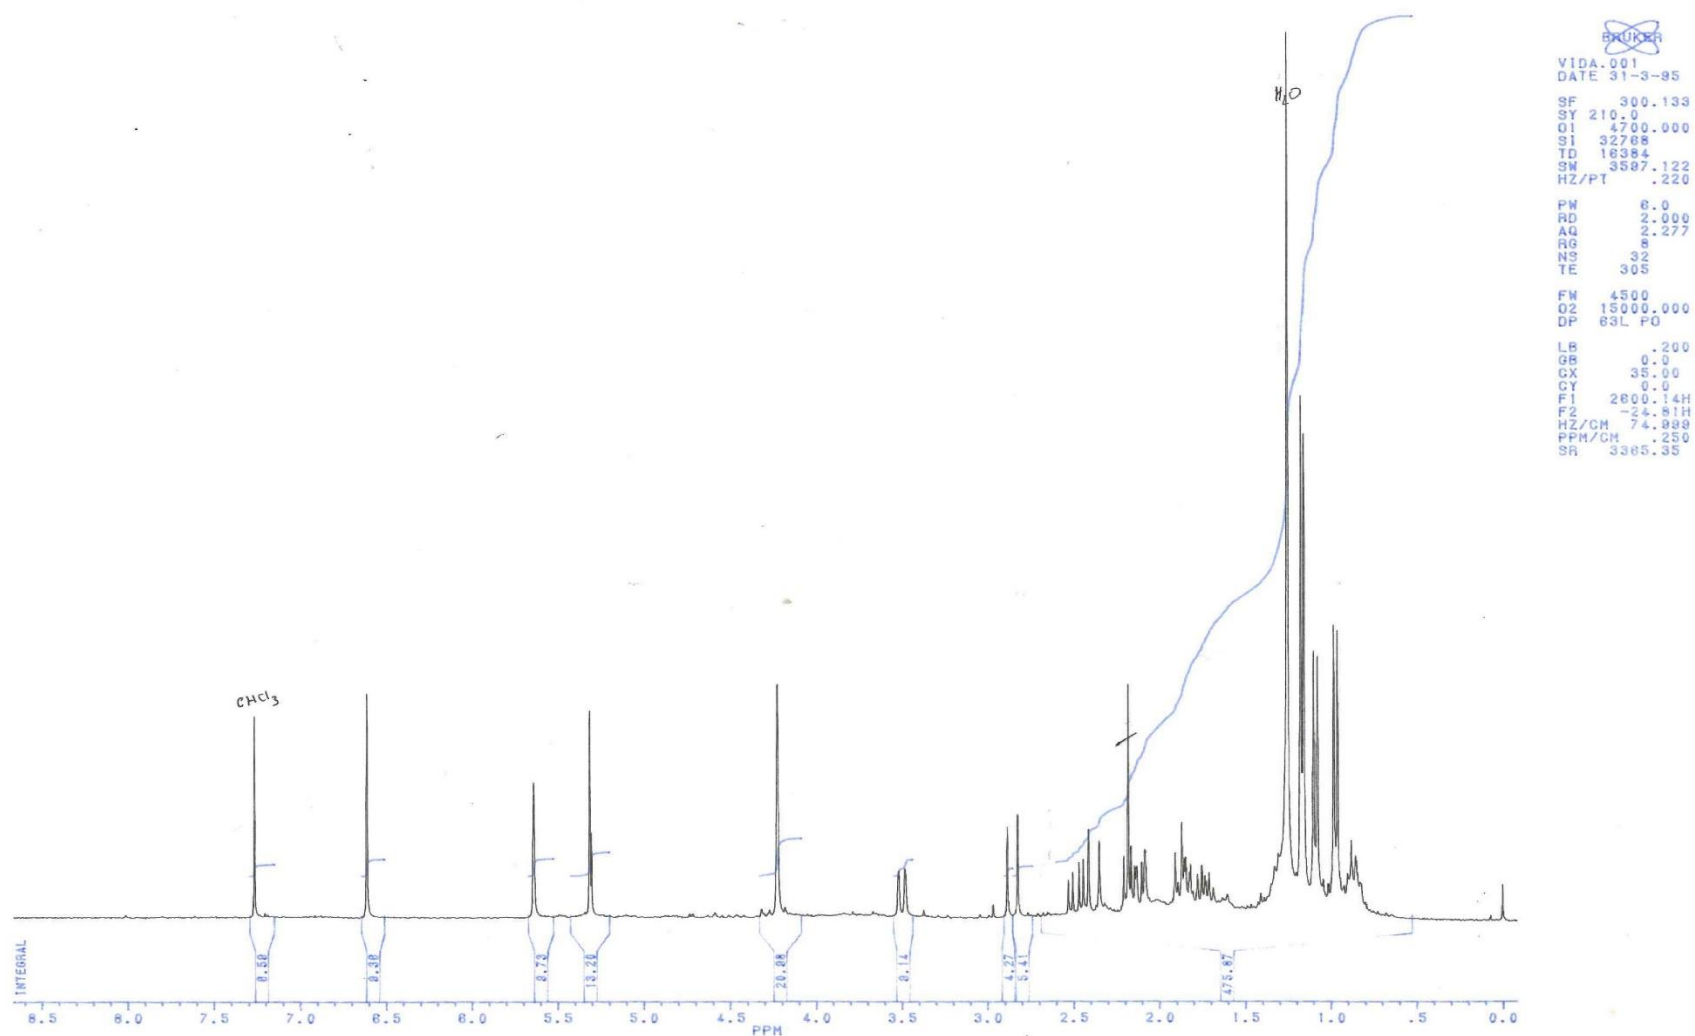

S1. <sup>1</sup>H NMR spectrum of Tricholomalide C (19).

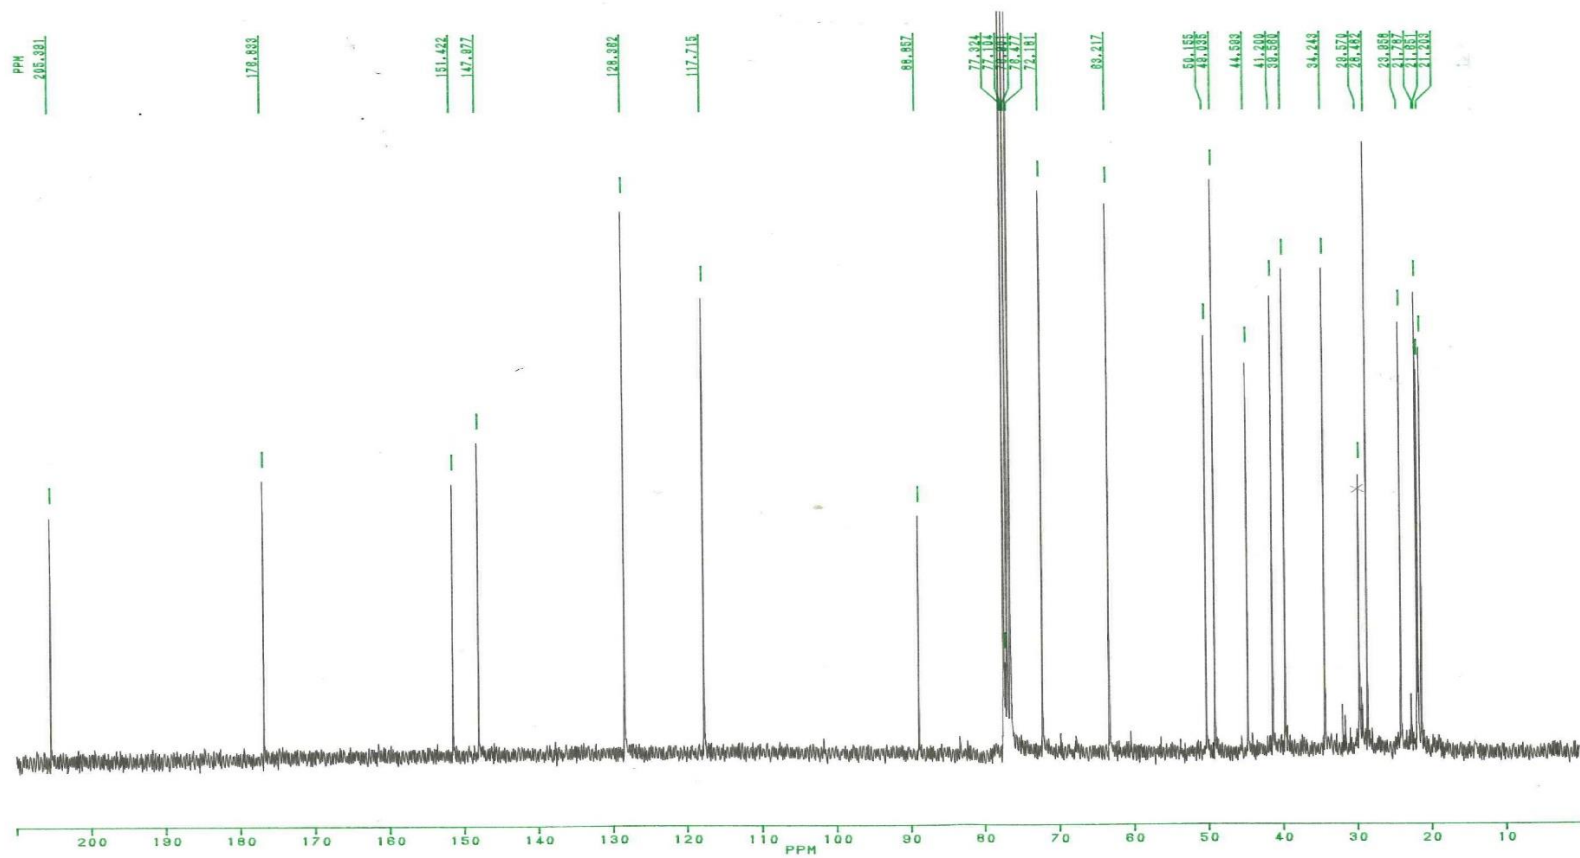

S2.  $^{13}\text{C}$  NMR spectrum of Tricholomalide C (19).

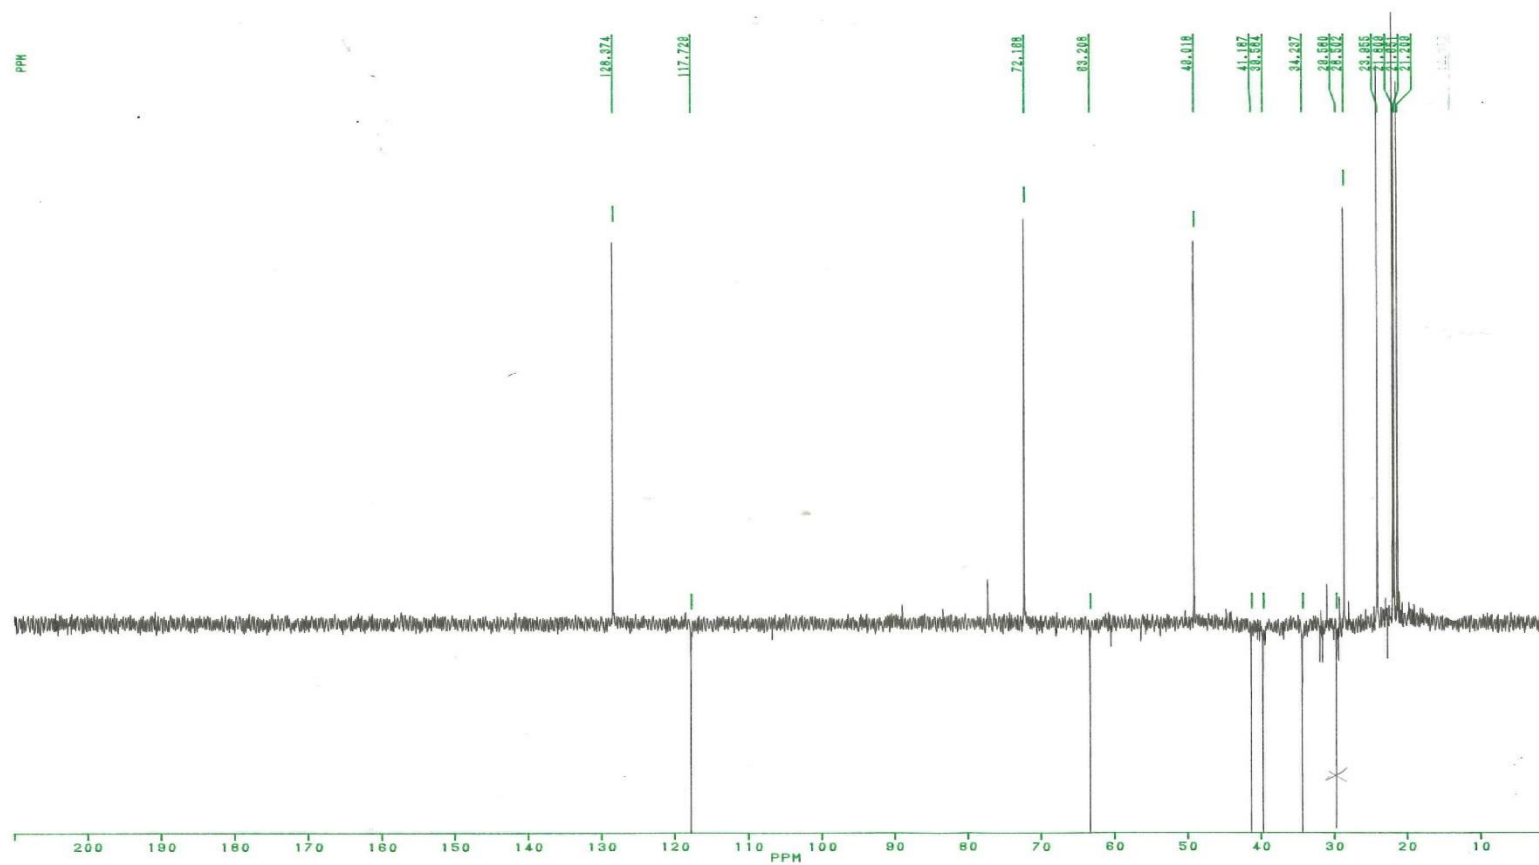

**S3. DEPT  $^{13}\text{C}$  NMR spectrum of Tricholomalide C (19).**

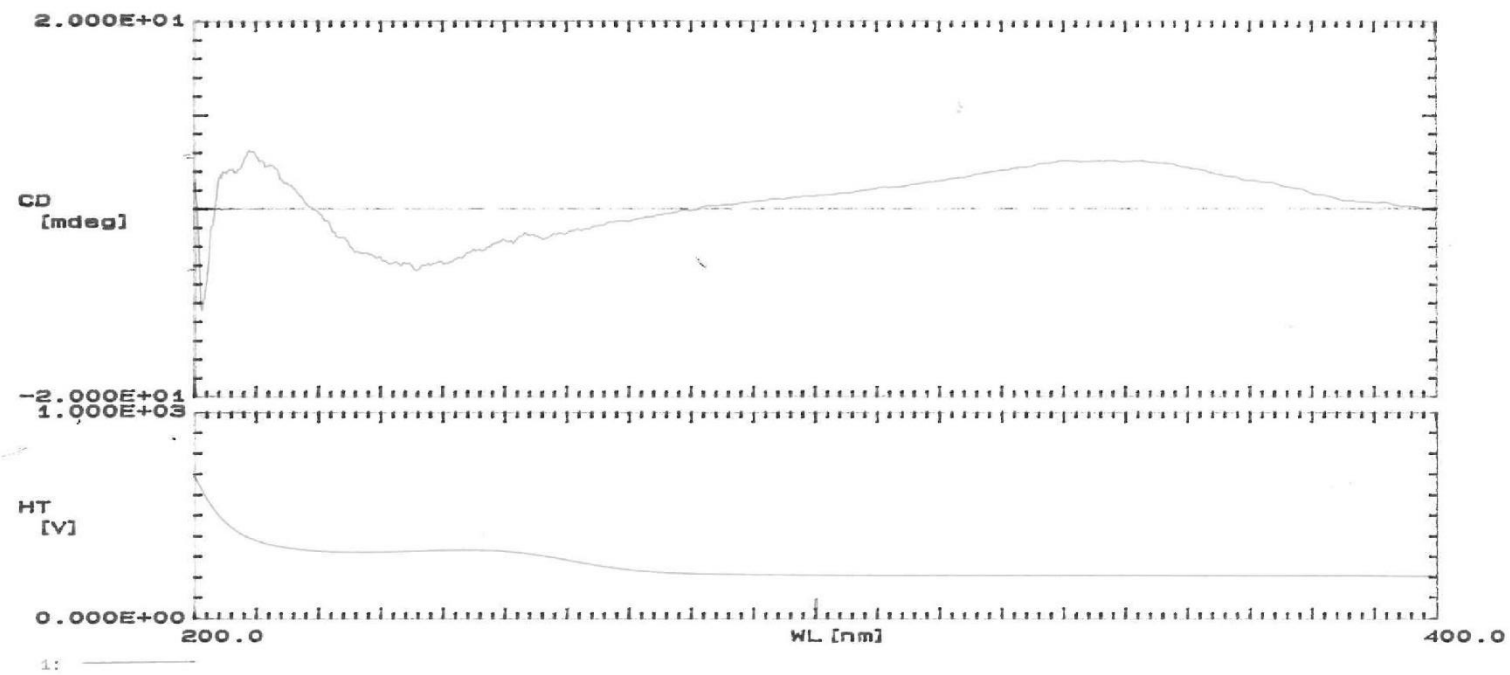

**S4. CD spectrum of Tricholomalide C (19).**

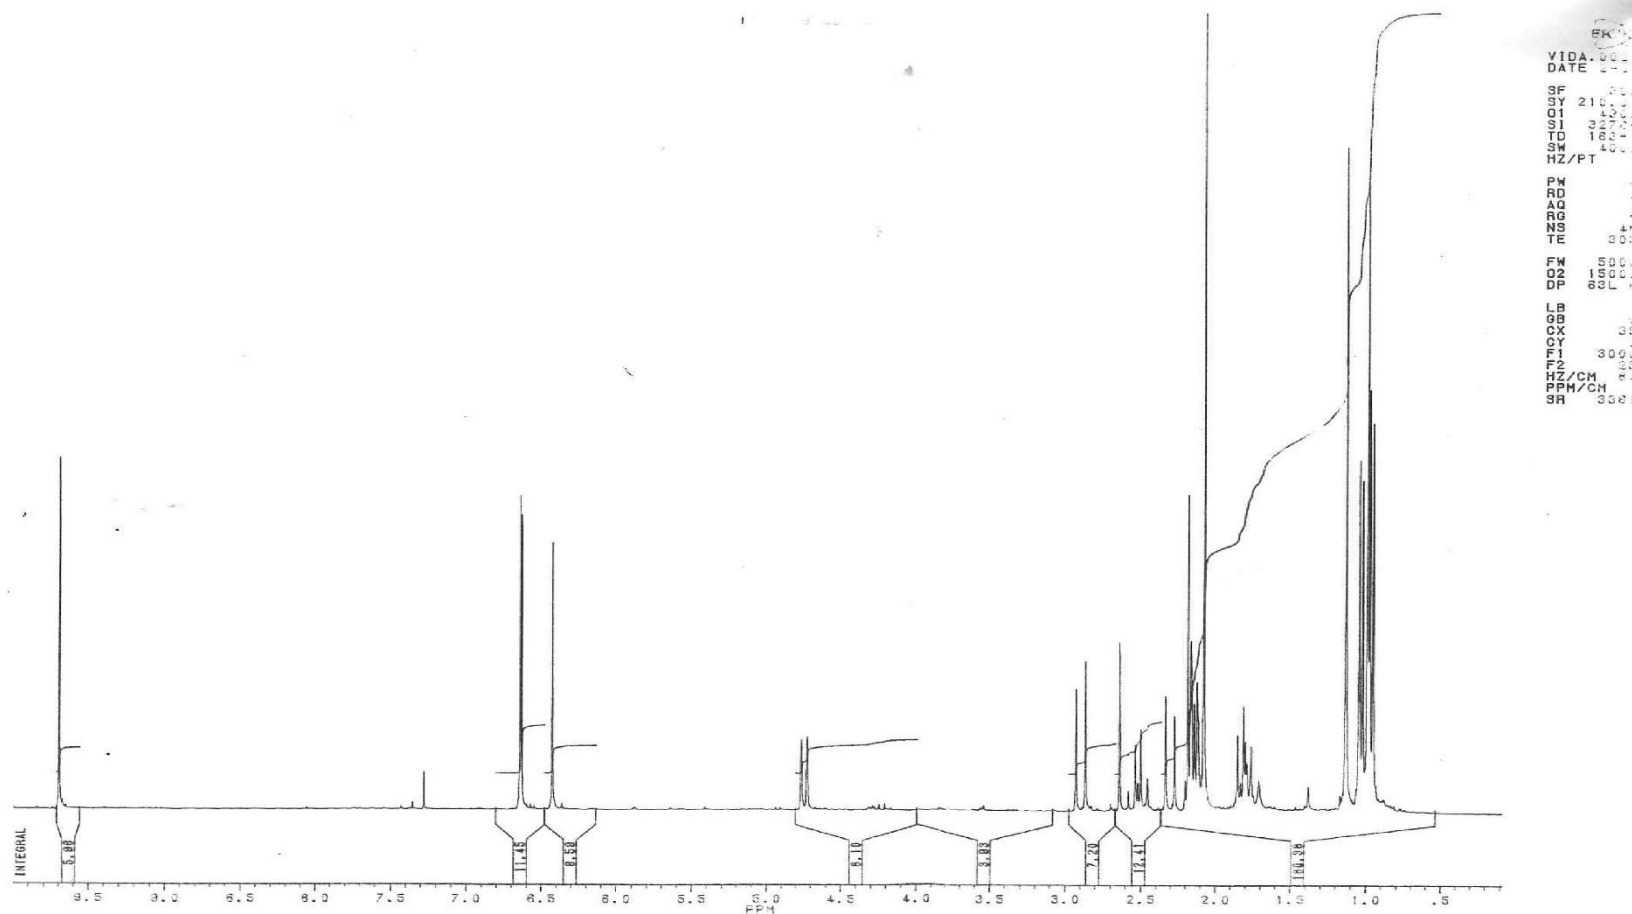

S5. <sup>1</sup>H NMR spectrum of Tricholomalide D (26).

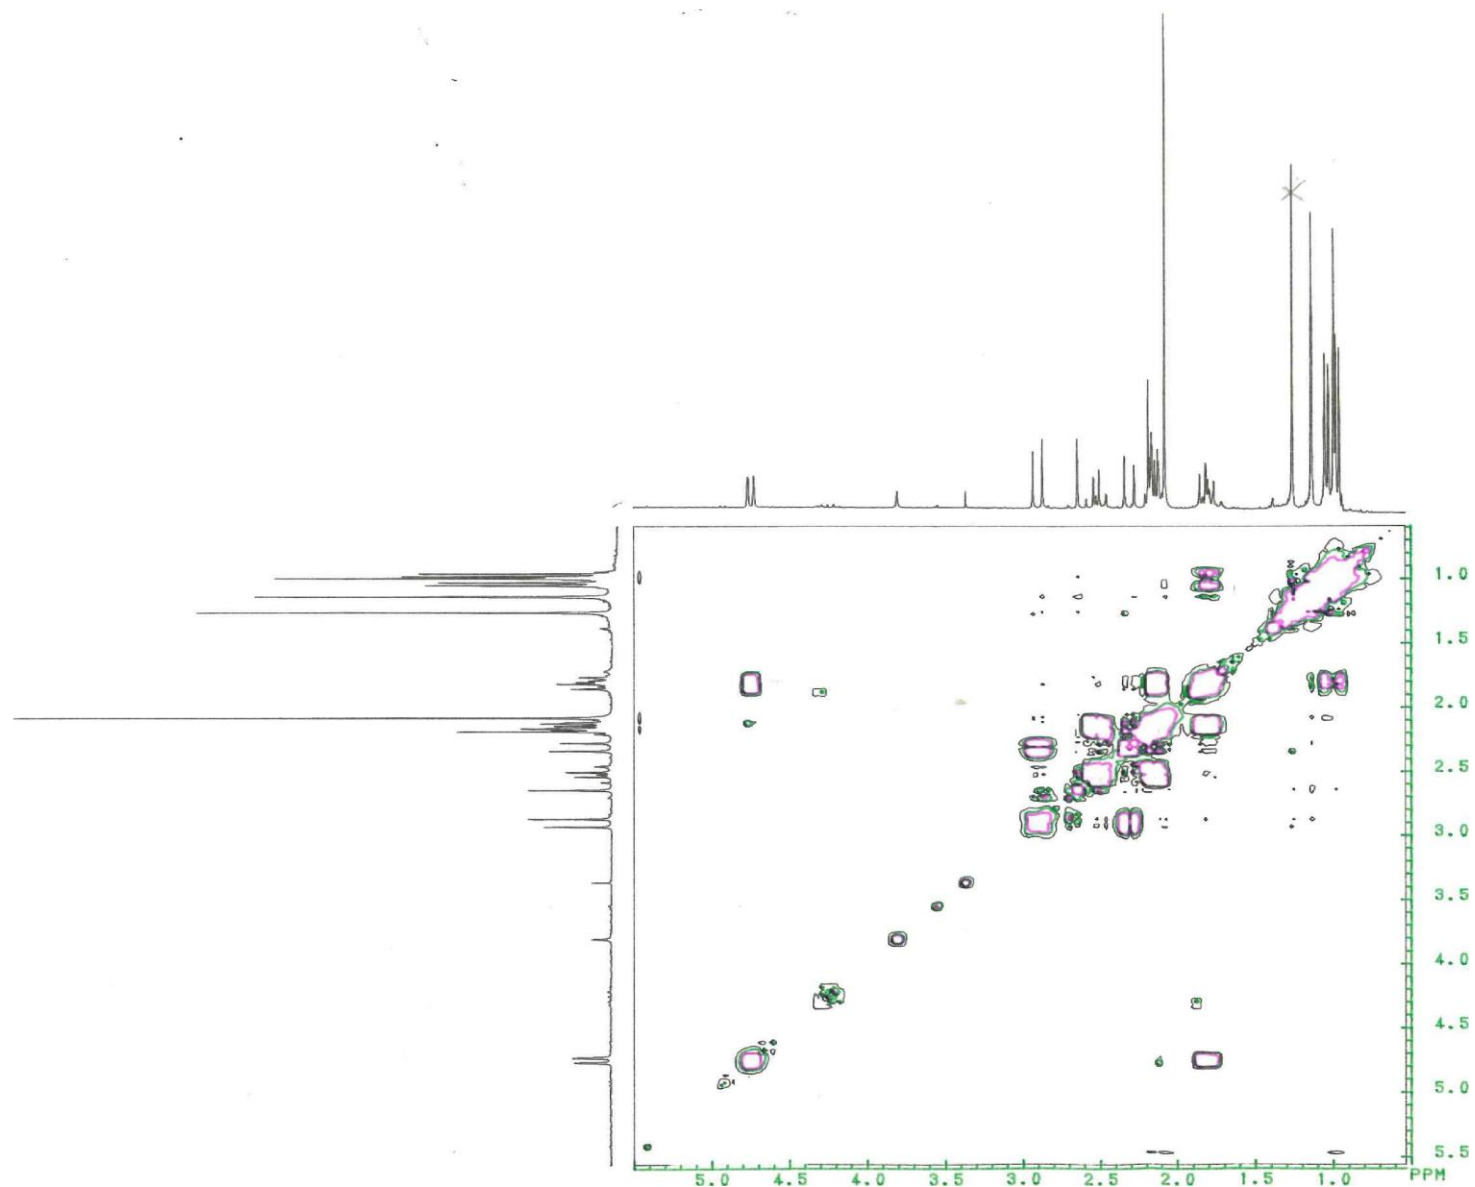

**S6. COSY spectrum of Tricholomalide D (26).**



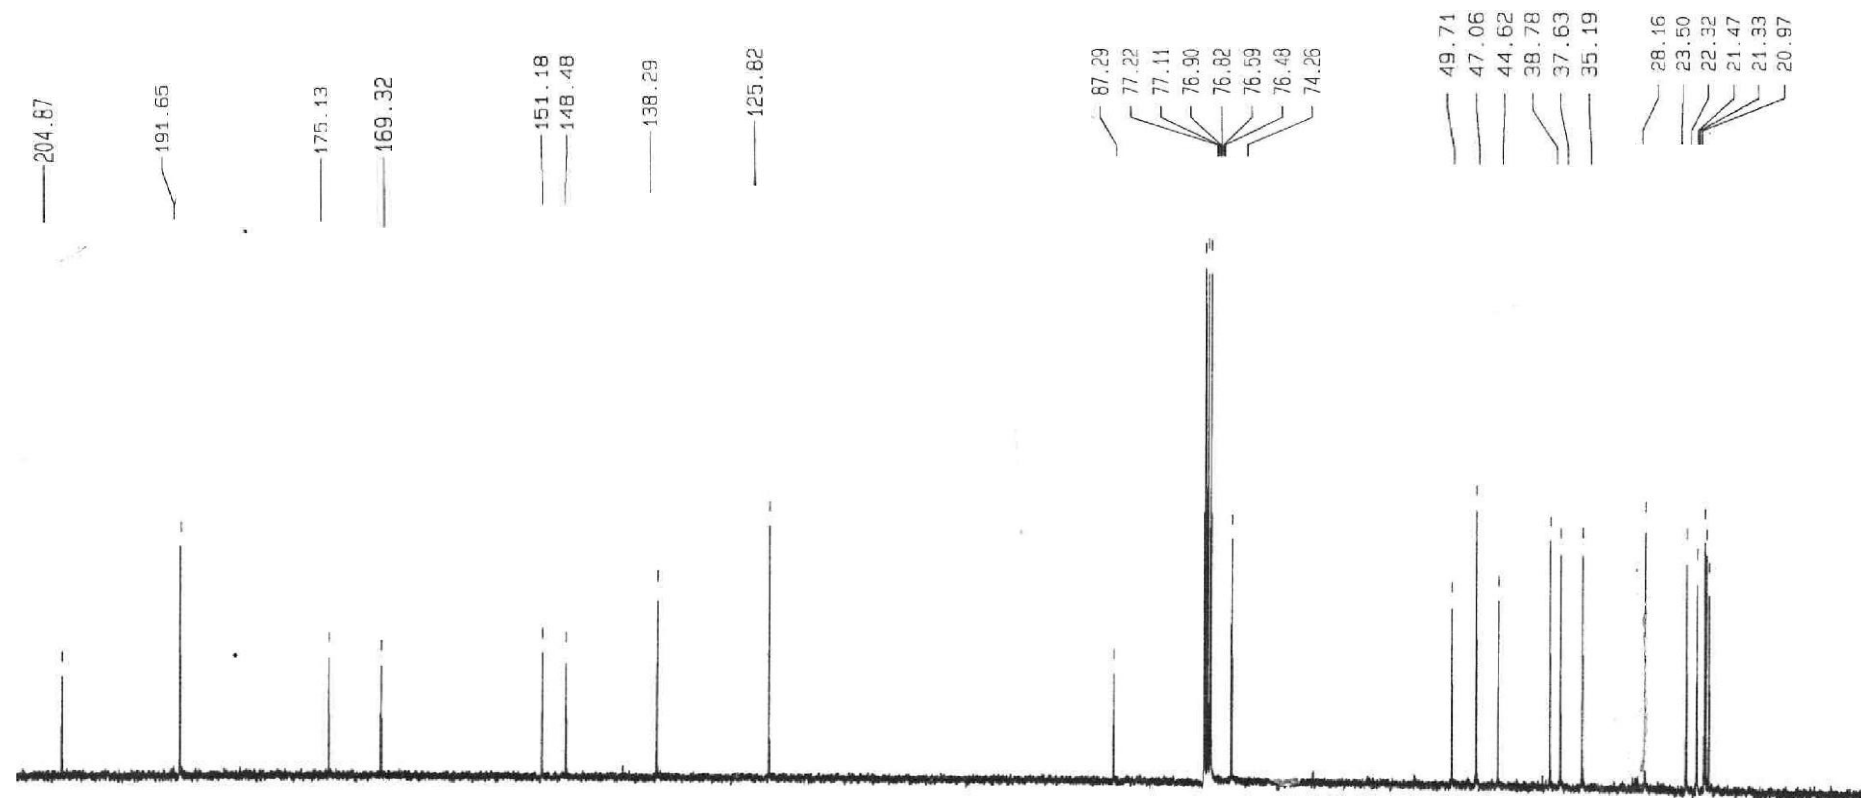

S7.  $^{13}\text{C}$  spectrum of Tricholomalide D (26).

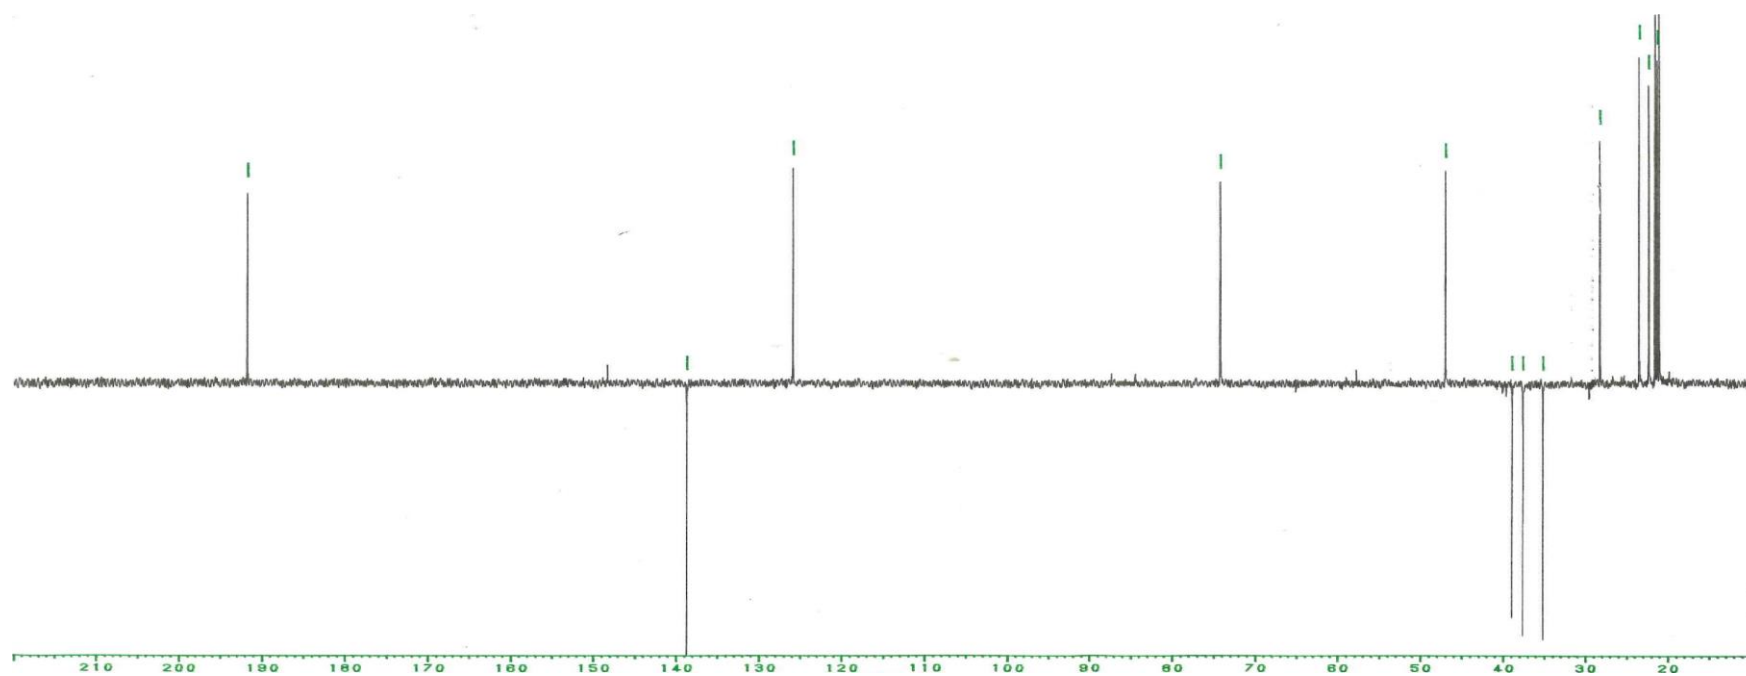

**S8. DEPT  $^{13}\text{C}$  spectrum of Tricholomalide D (26).**

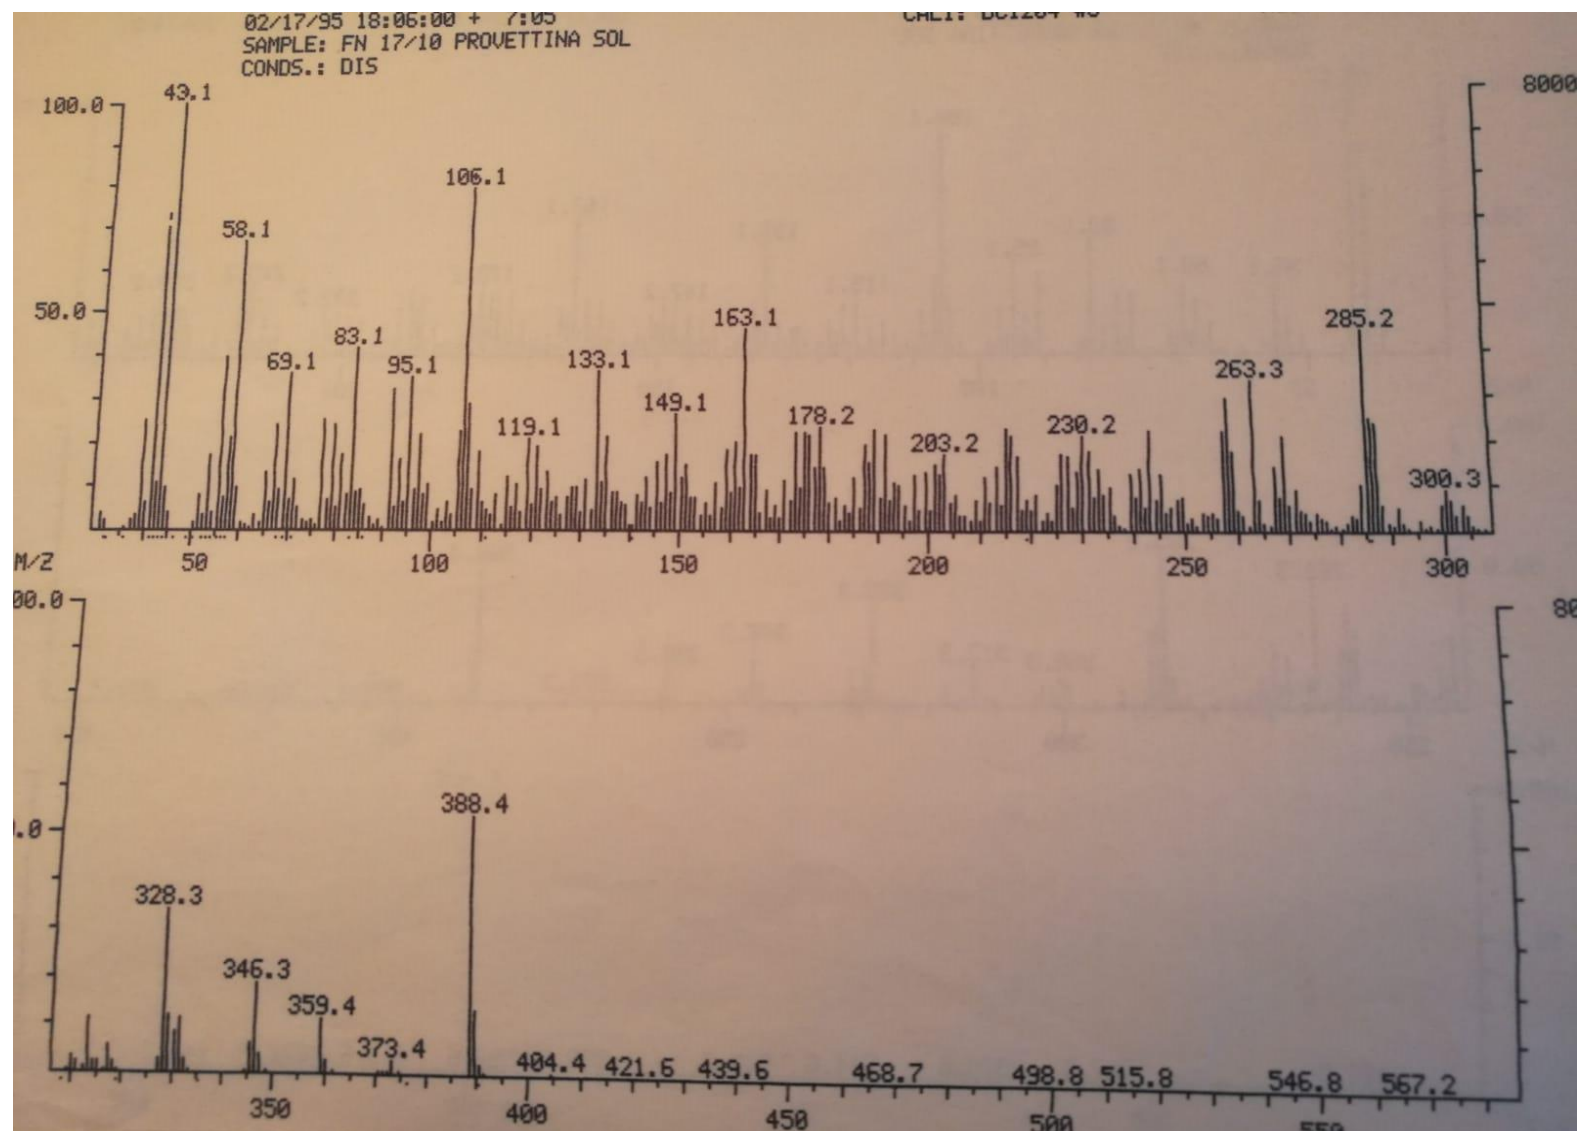

**S9. EIMS spectrum of Tricholomalide D (26).**

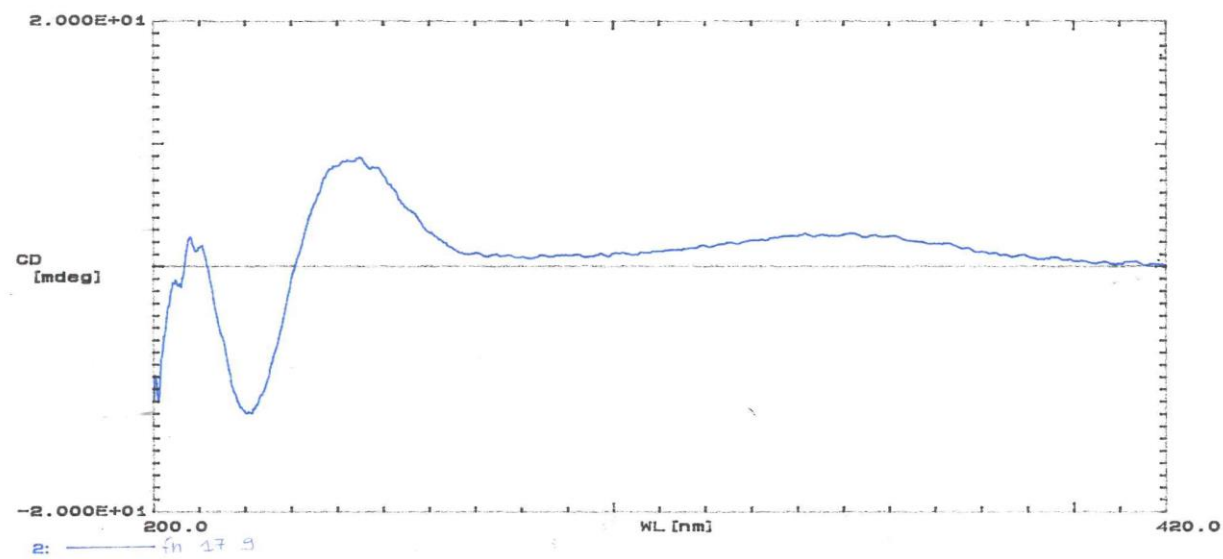

**S10. CD spectrum of Tricholomalide D (26).**

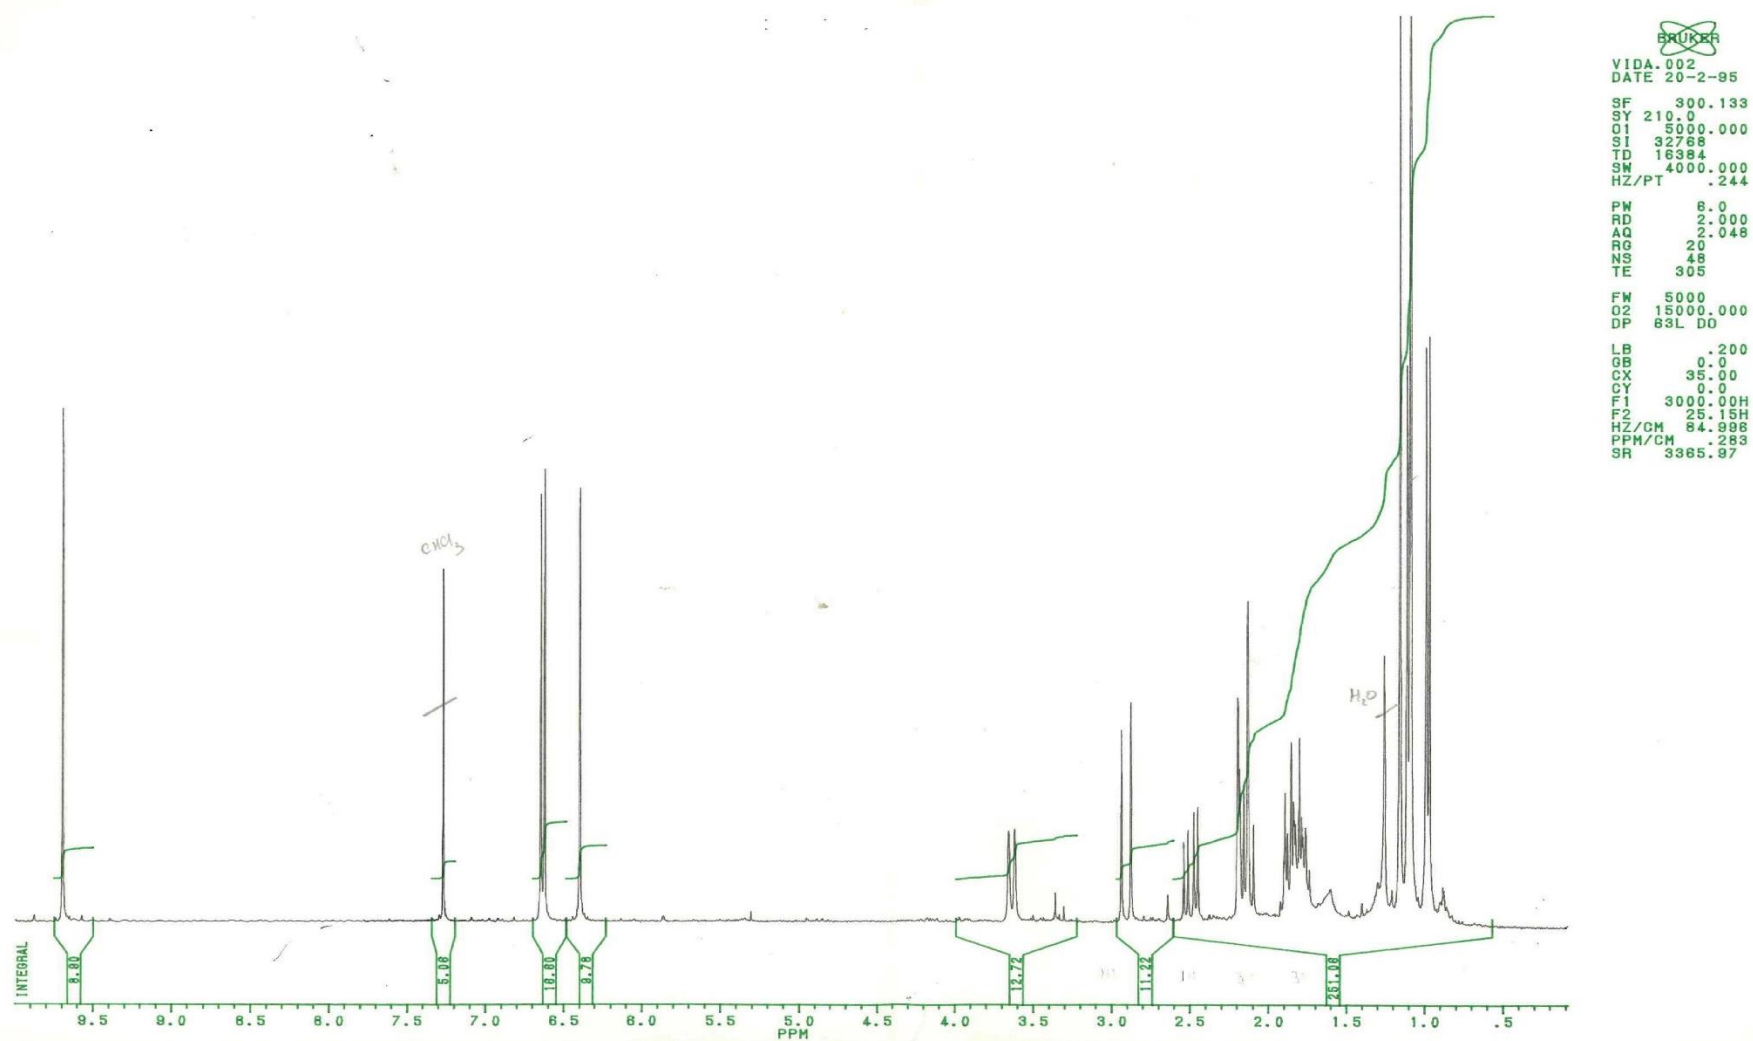

S11.  $^1\text{H}$  NMR spectrum of Tricholomalide E (27).

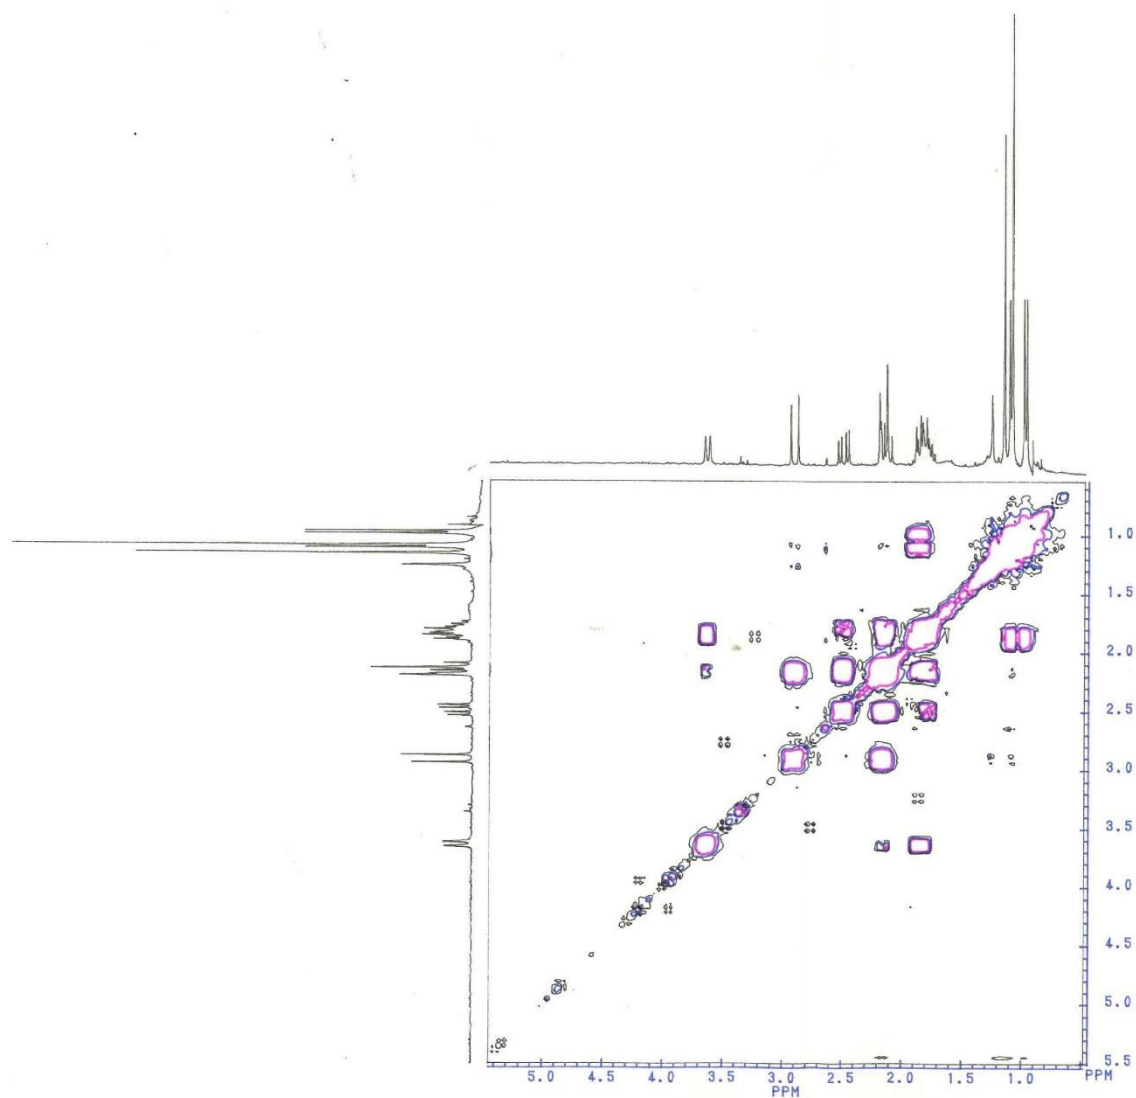

**S12. COSY spectrum of Tricholomalide E (27).**

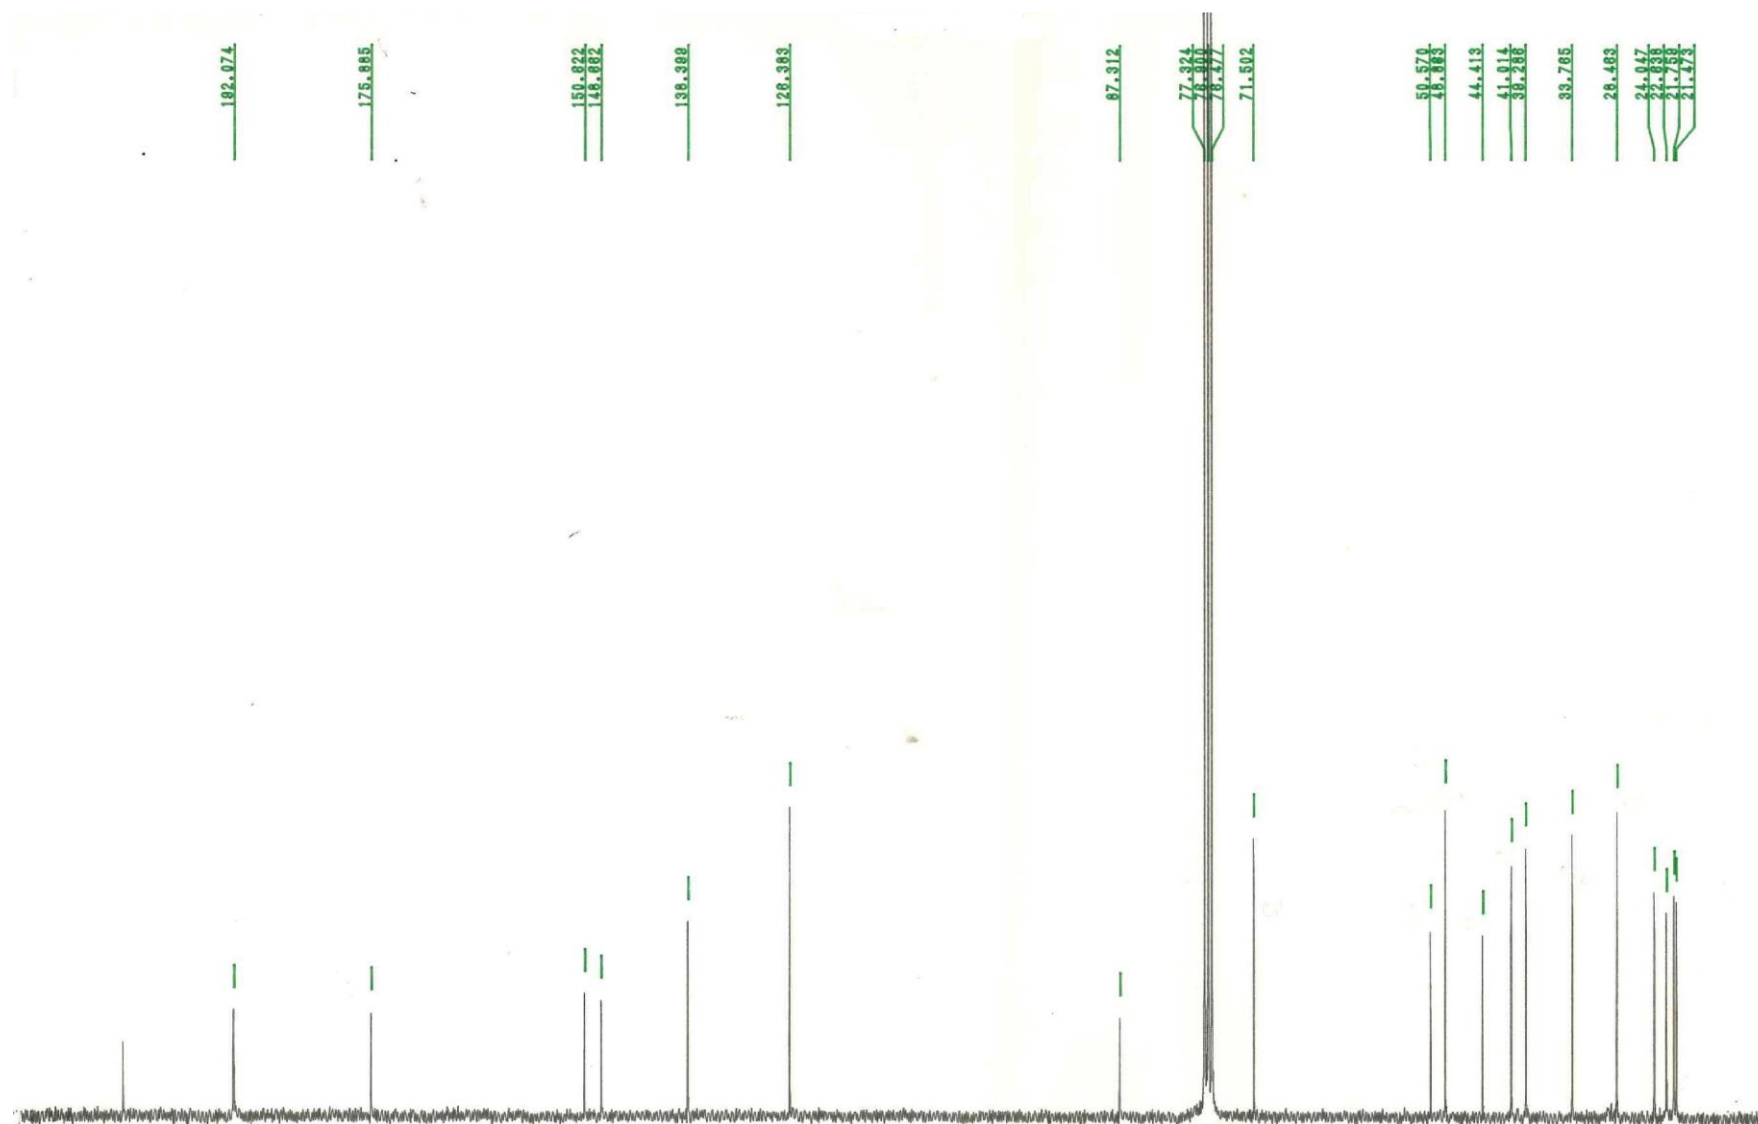

S13.  $^{13}\text{C}$  NMR spectrum of Tricholomalide E (27).

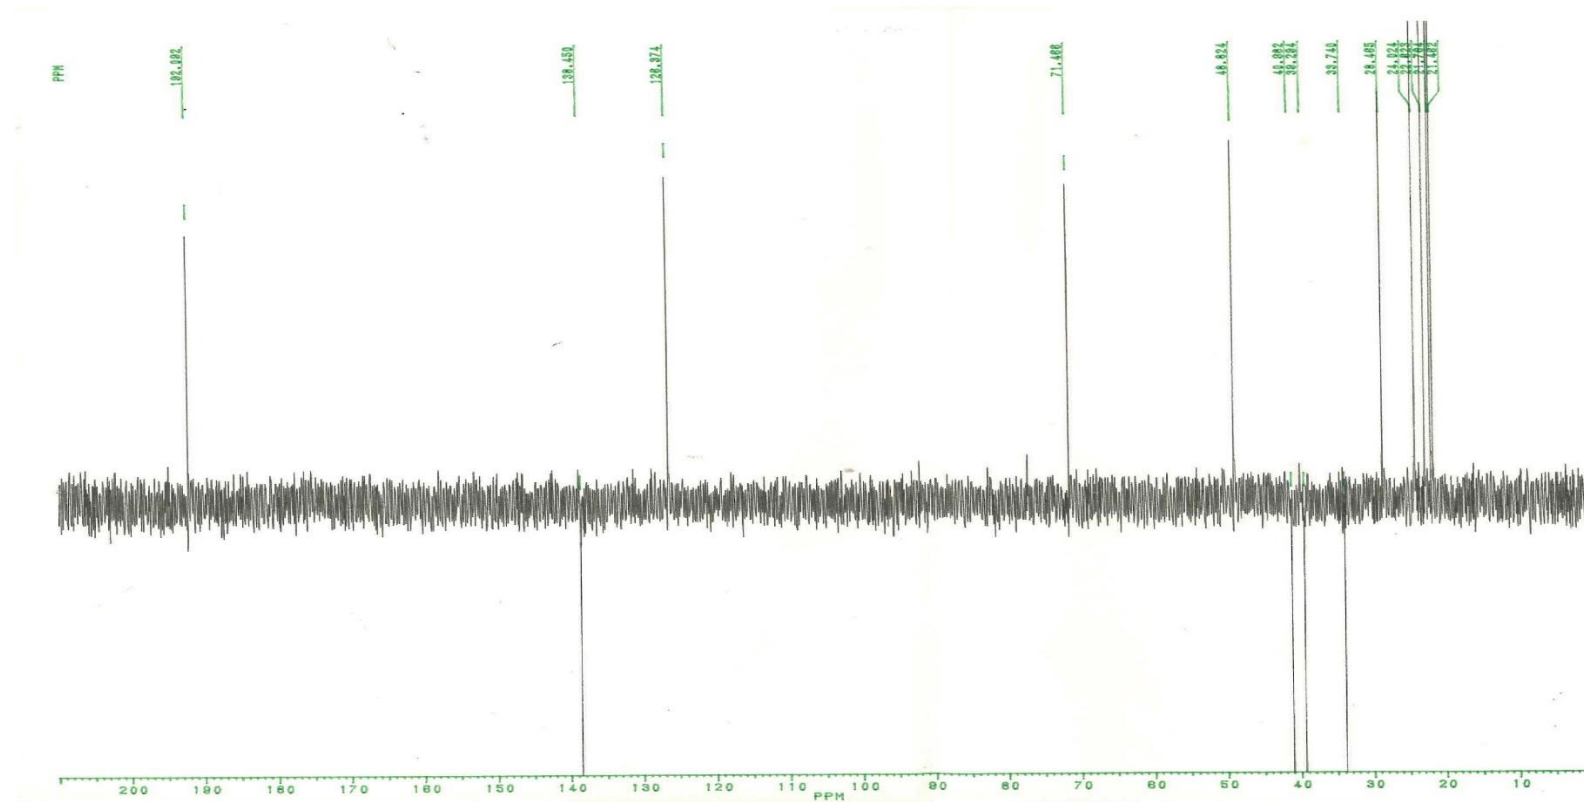

**S14. DEPT  $^{13}\text{C}$  NMR spectrum of Tricholomalide E (27).**



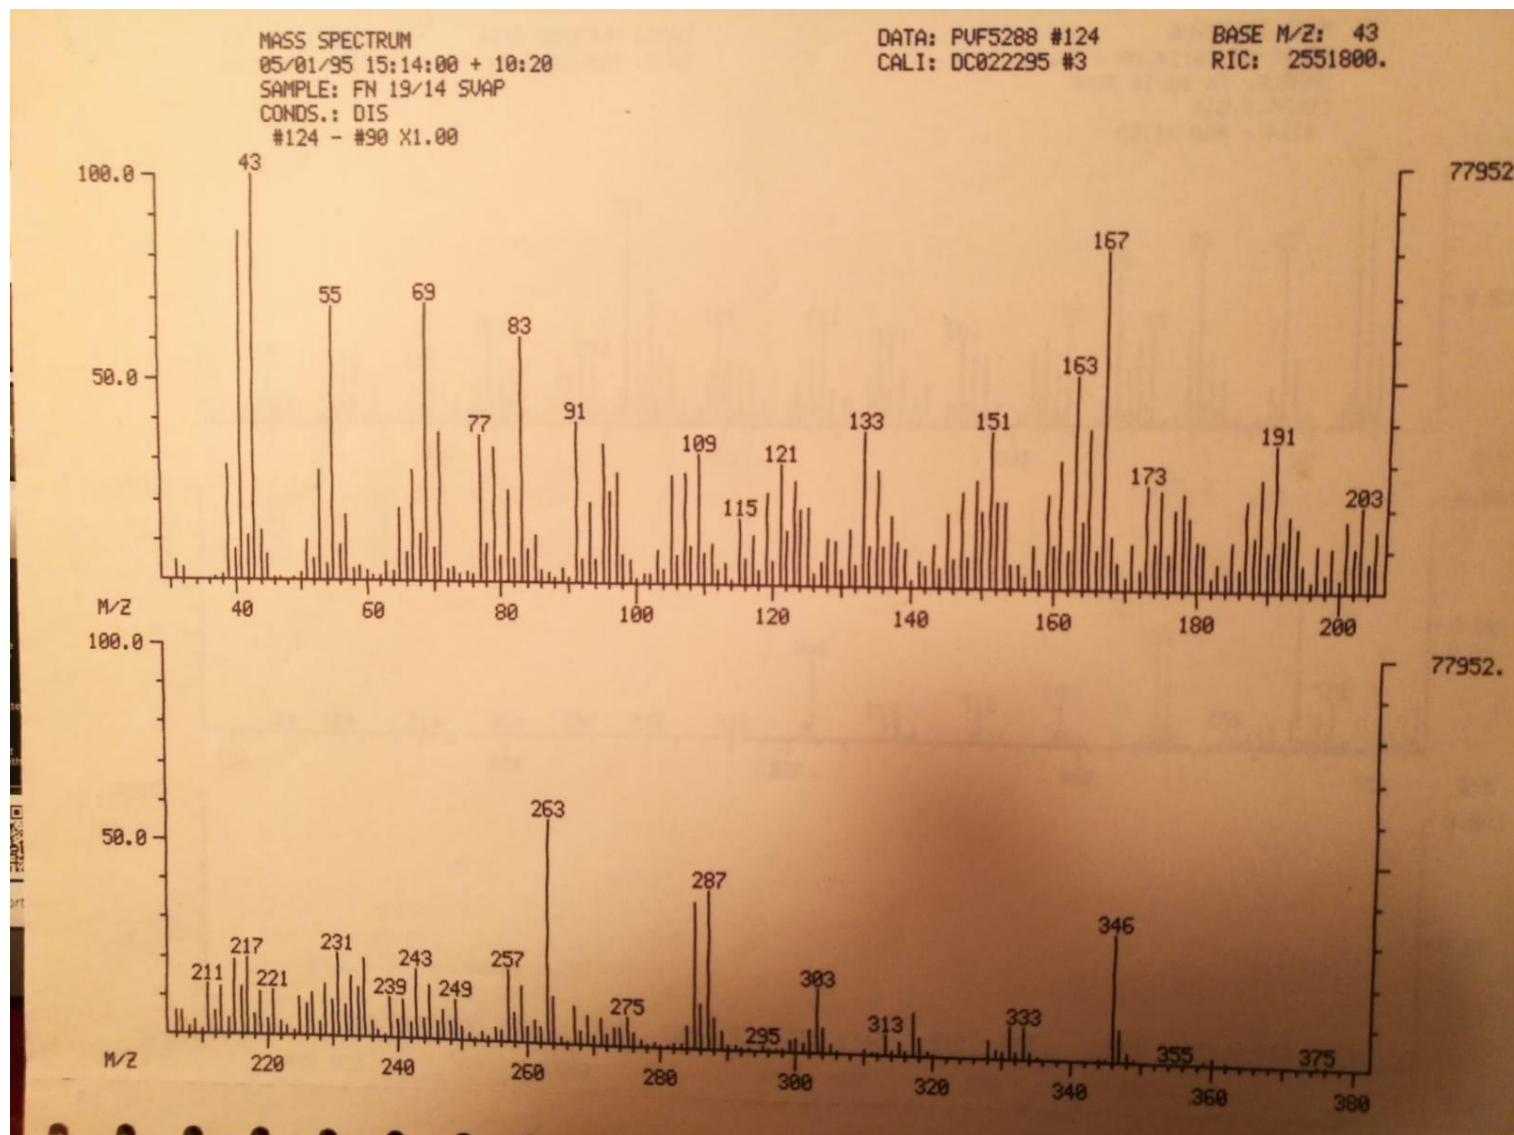

S15. EIMS spectrum of Tricholomalide E (27).

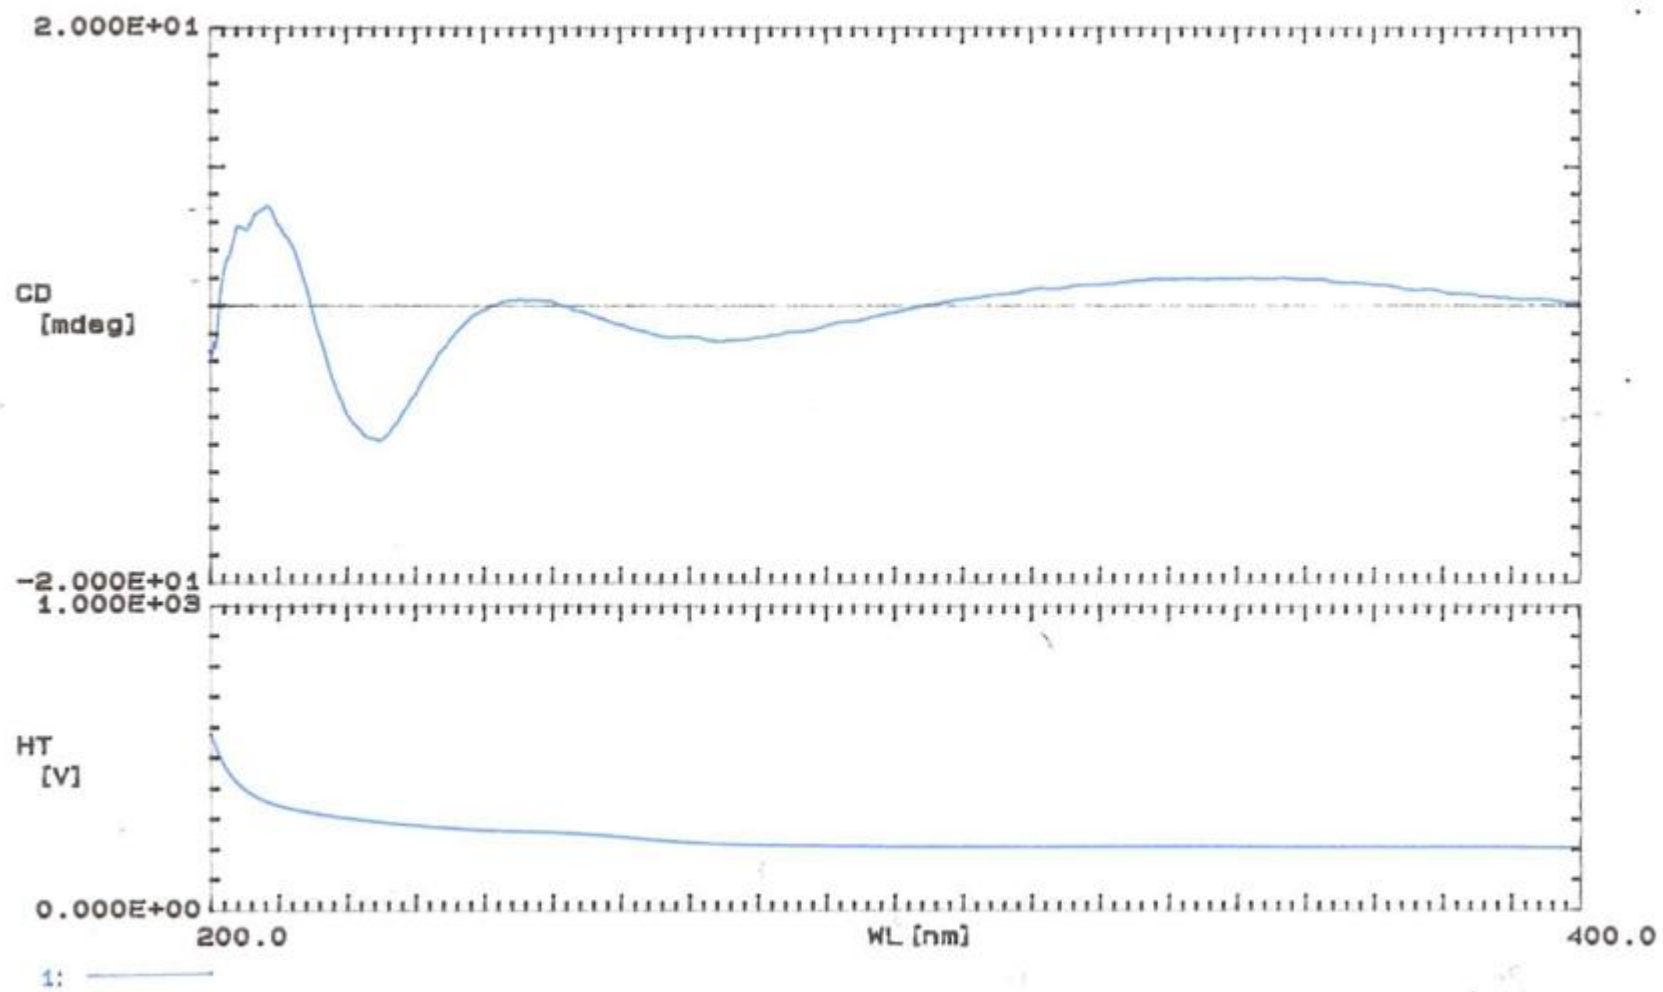

**S16. CD spectrum of Tricholomalide E (27).**

W140000 2 2

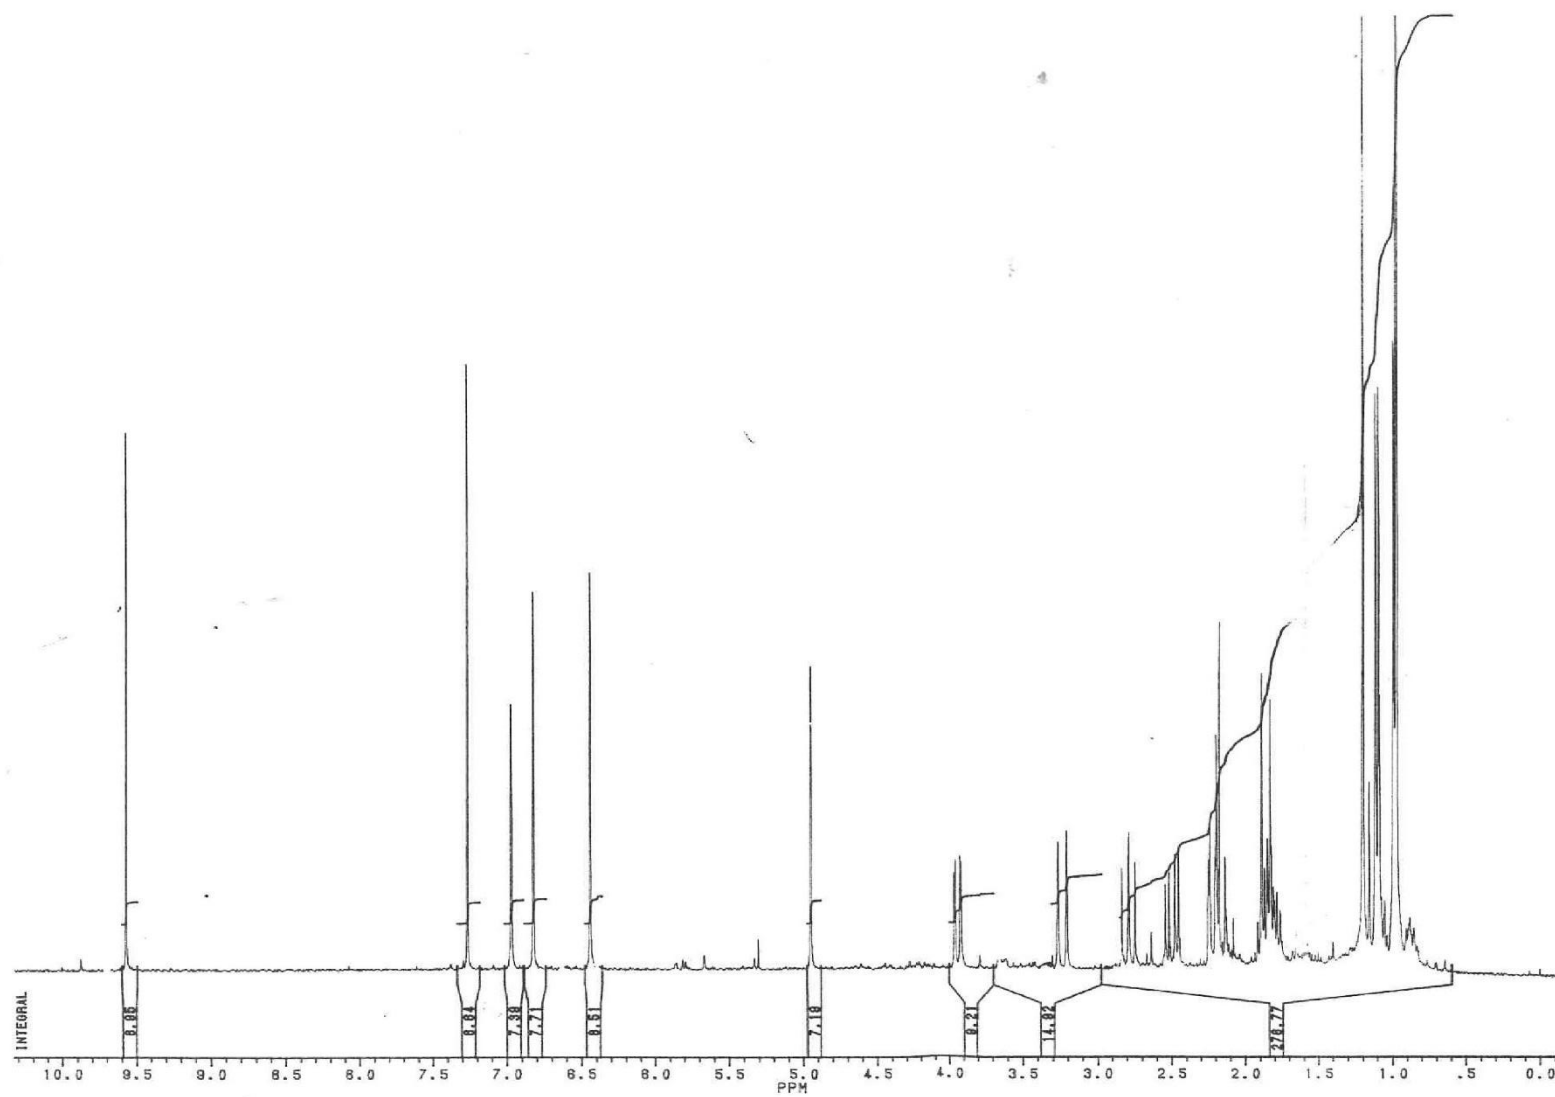

**S17.**  $^1\text{H}$  NMR spectrum of Tricholomalide F (28).

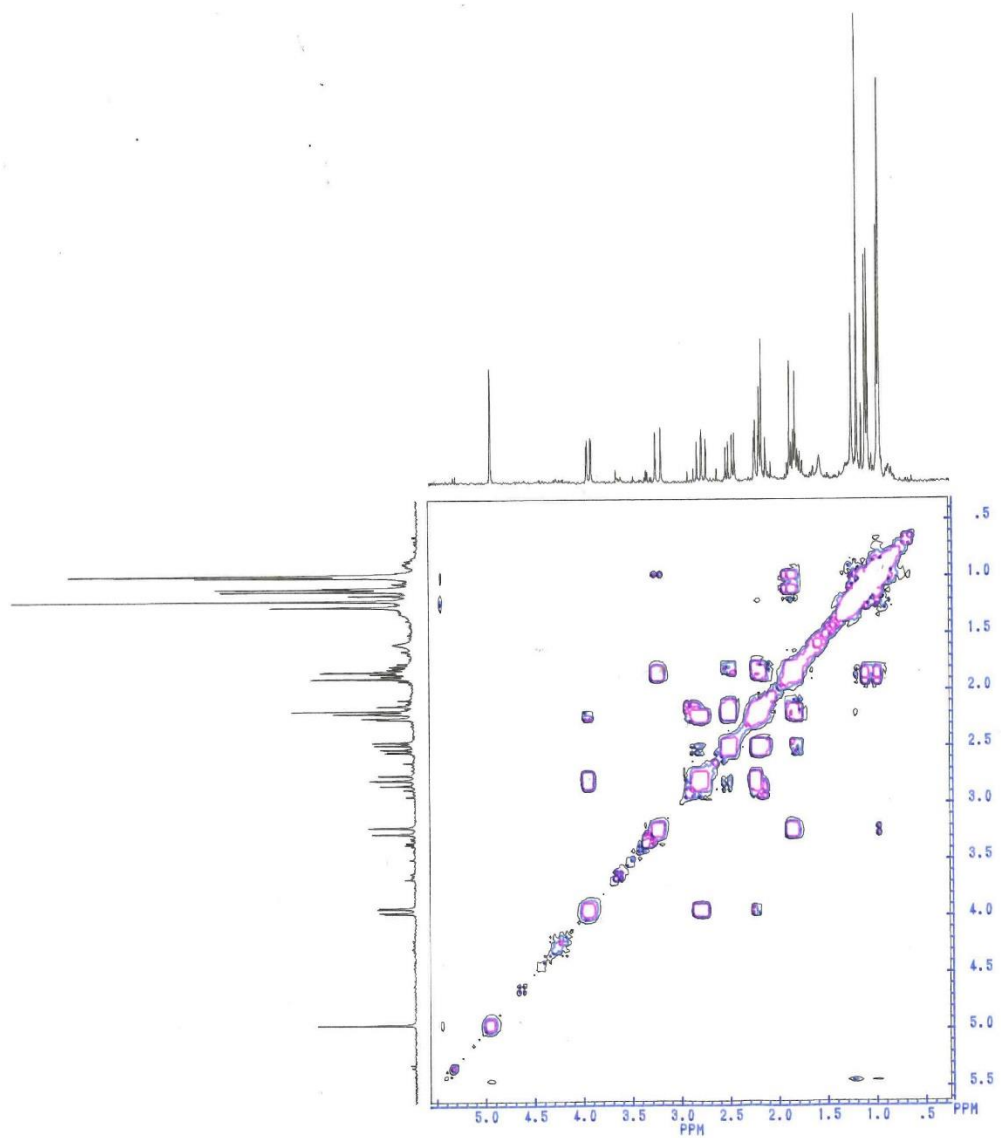

**S18. COSY spectrum of Tricholomalide F (28).**

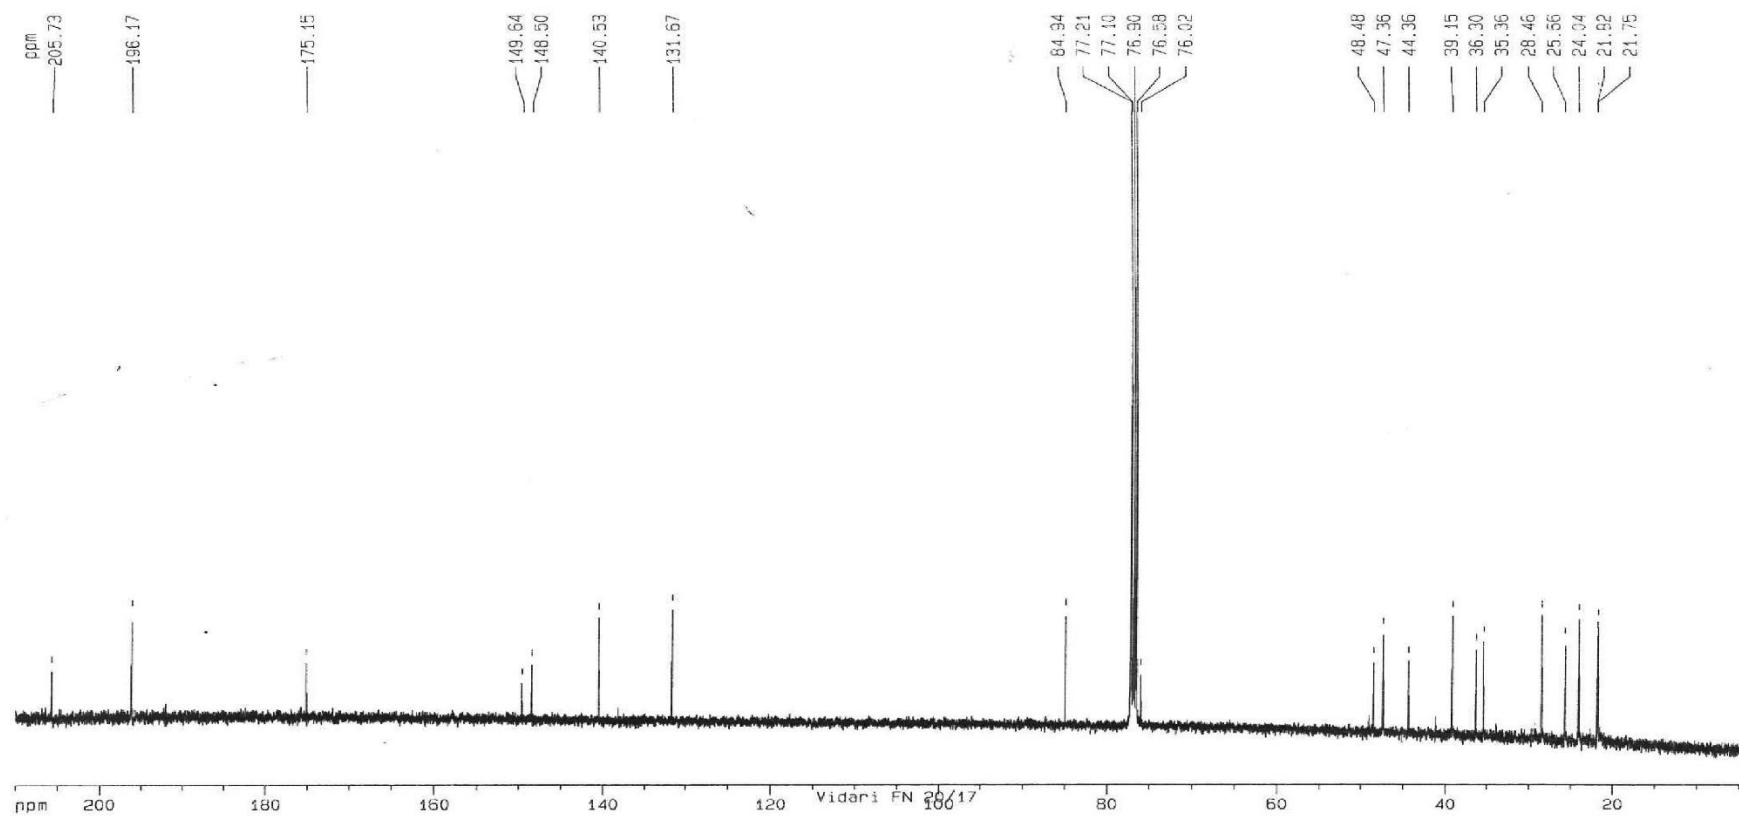

**S19.**  $^{13}\text{C}$  NMR spectrum of Tricholomalide F (28).

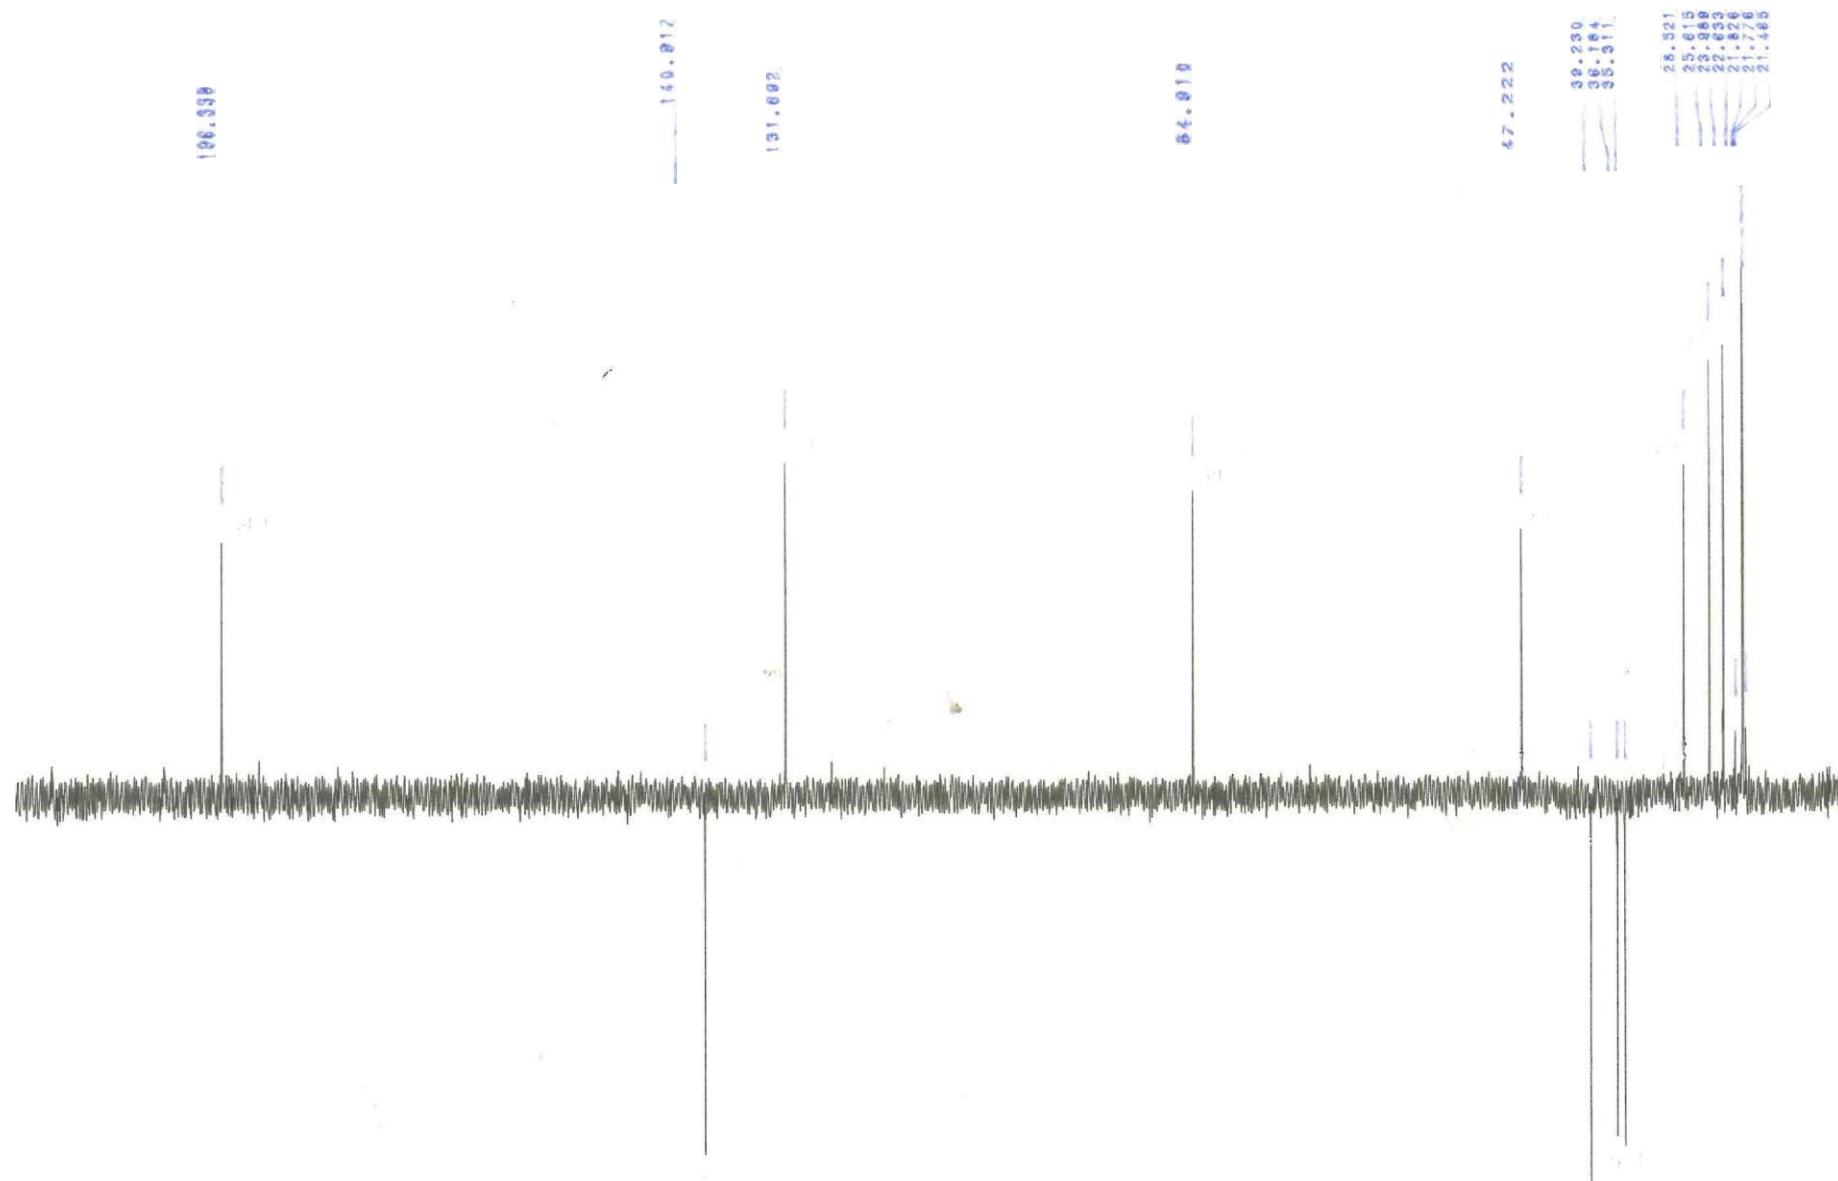

**S20. DEPT  $^{13}\text{C}$  NMR spectrum of Tricholomalide F (28).**

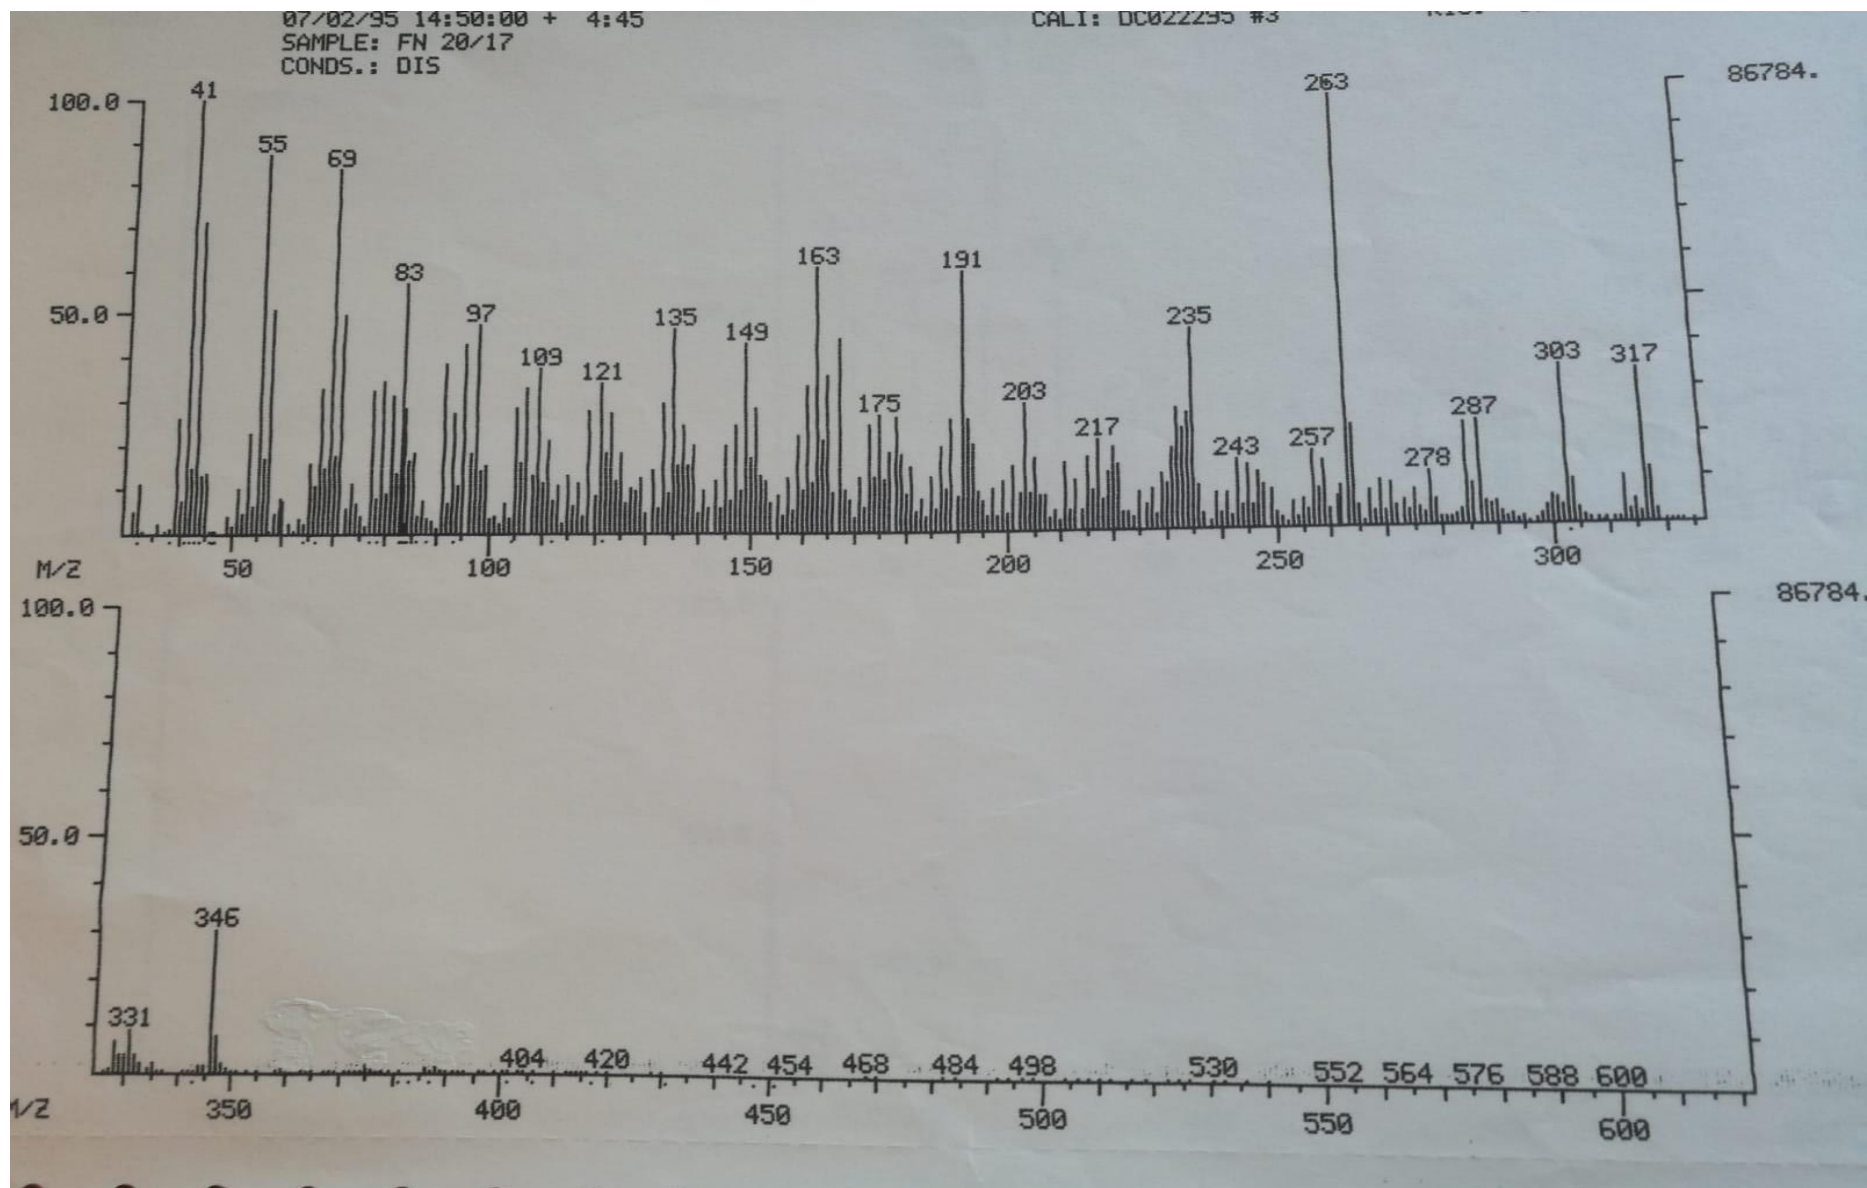

**S21. EIMS spectrum of Tricholomalide F (28).**

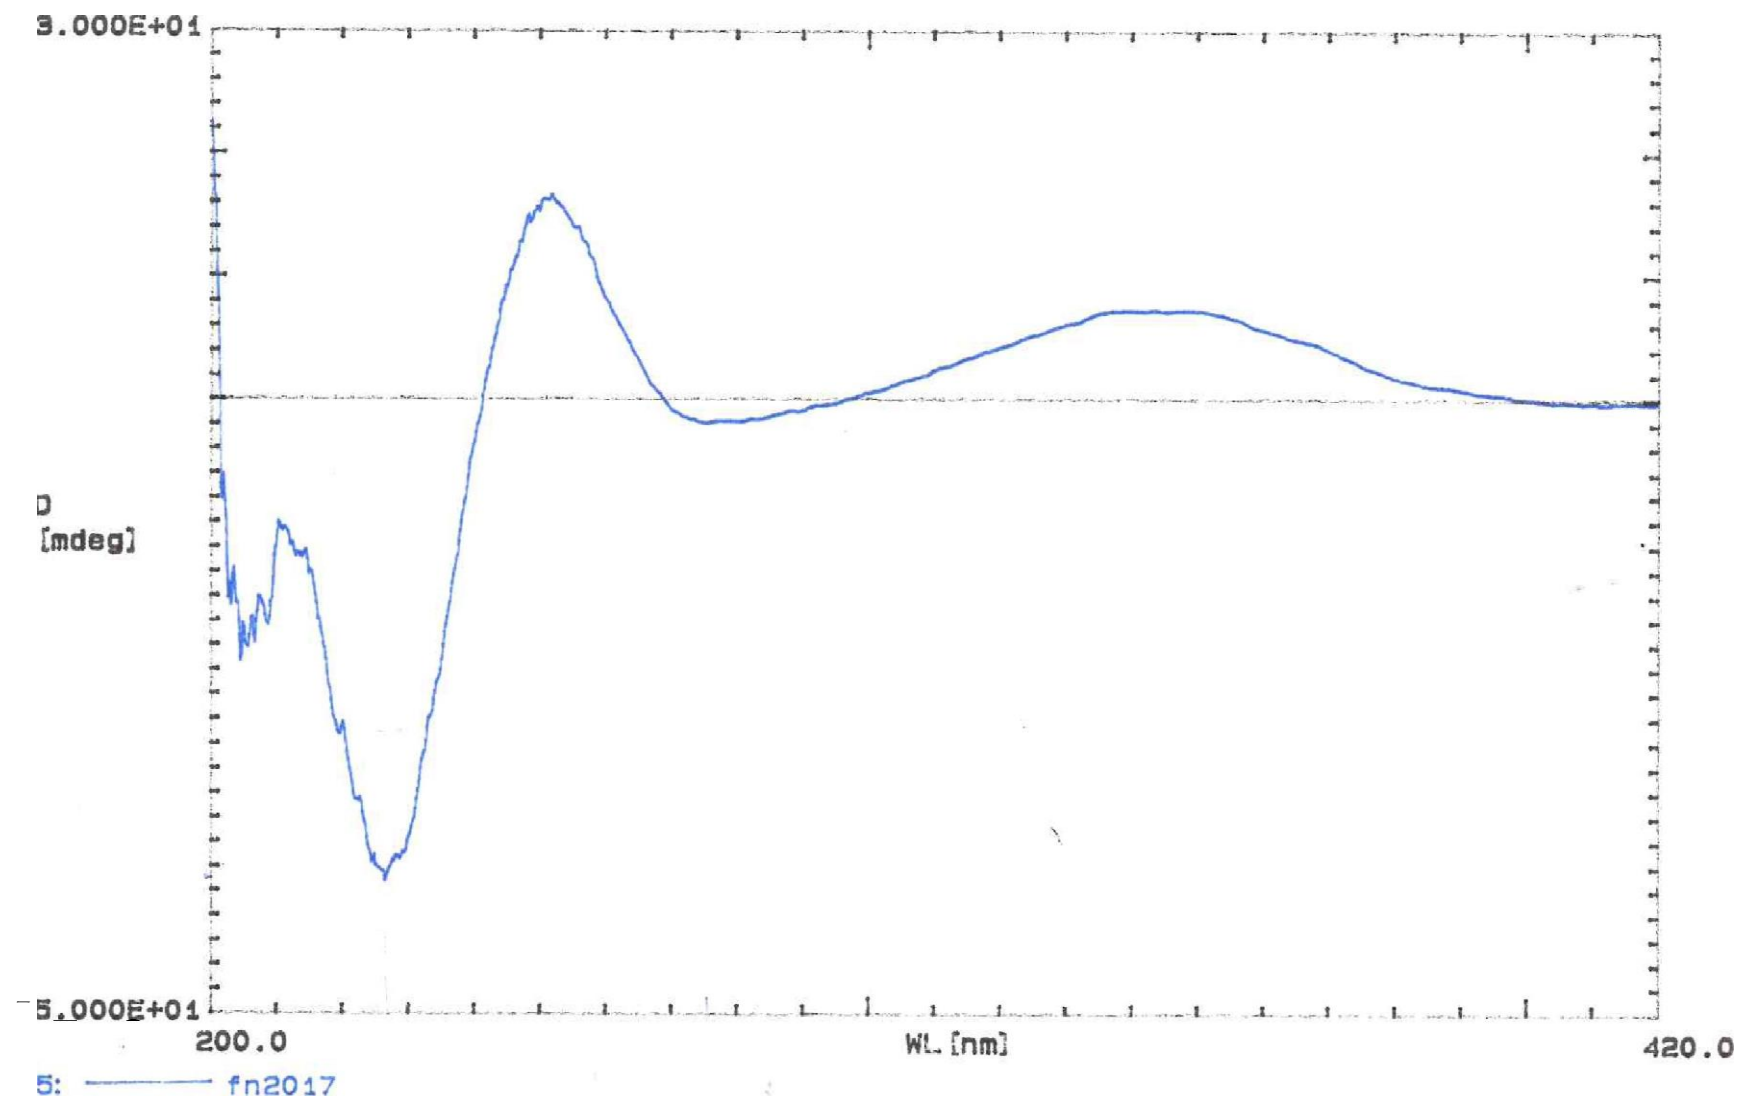

**S22. CD spectrum of Tricholomalide F (28).**



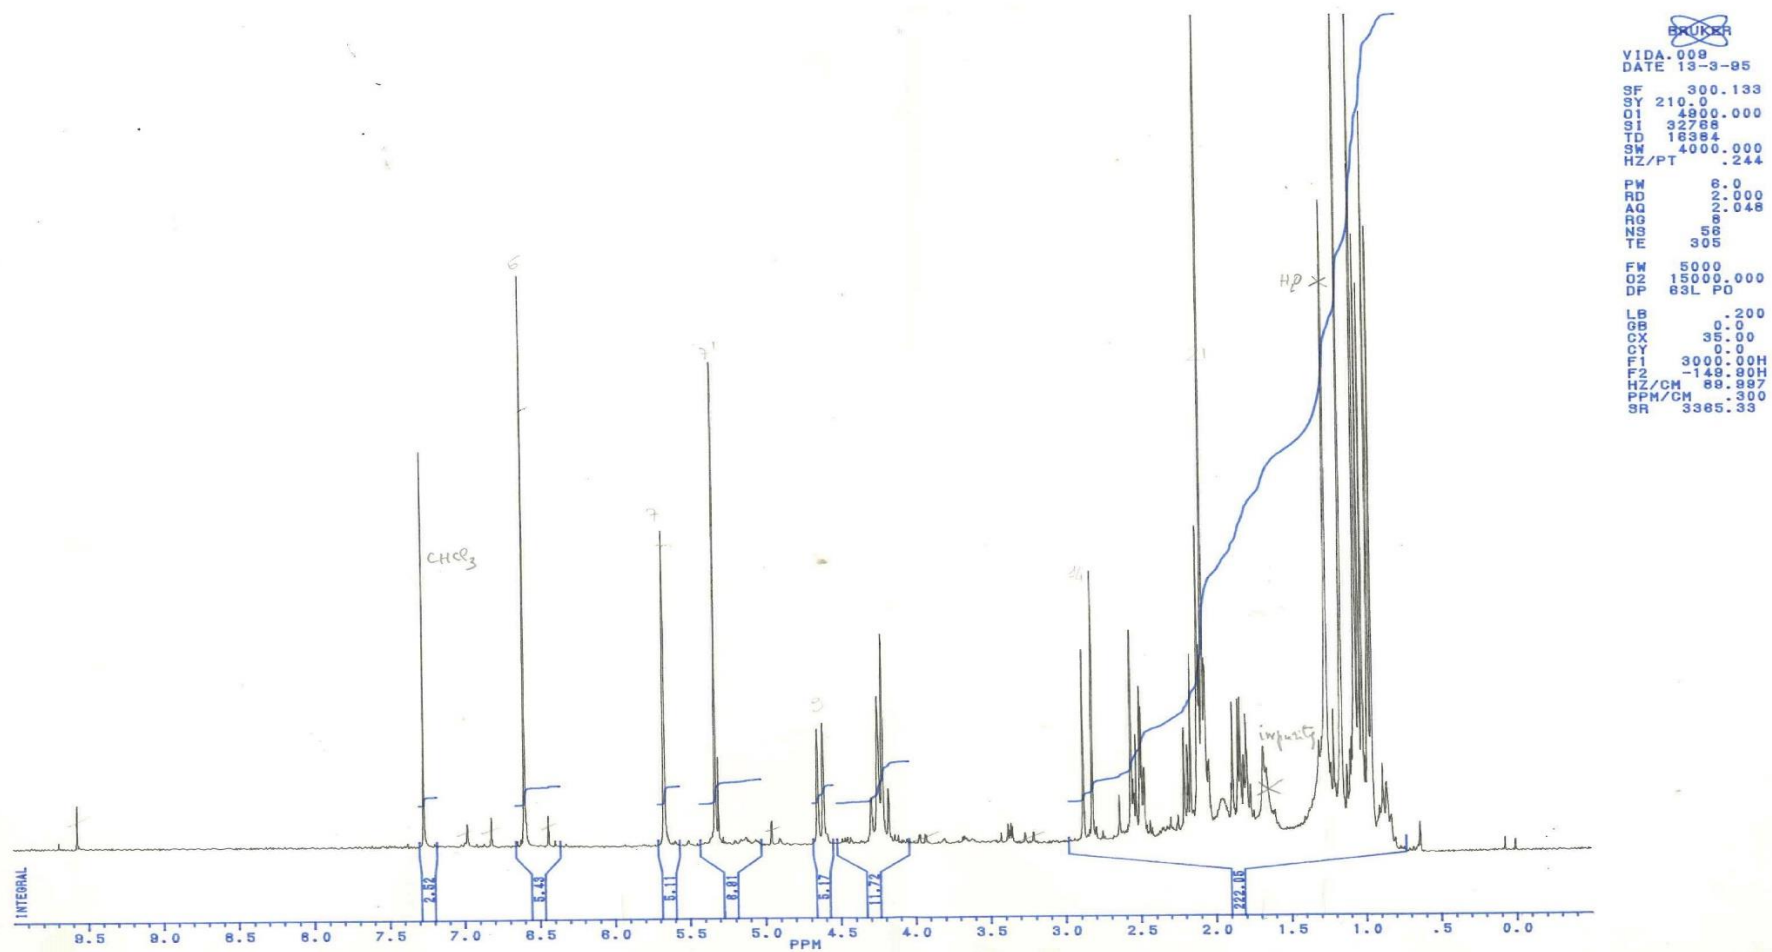

**S23.  $^1\text{H}$  NMR spectrum of Tricholomalide G (29).**

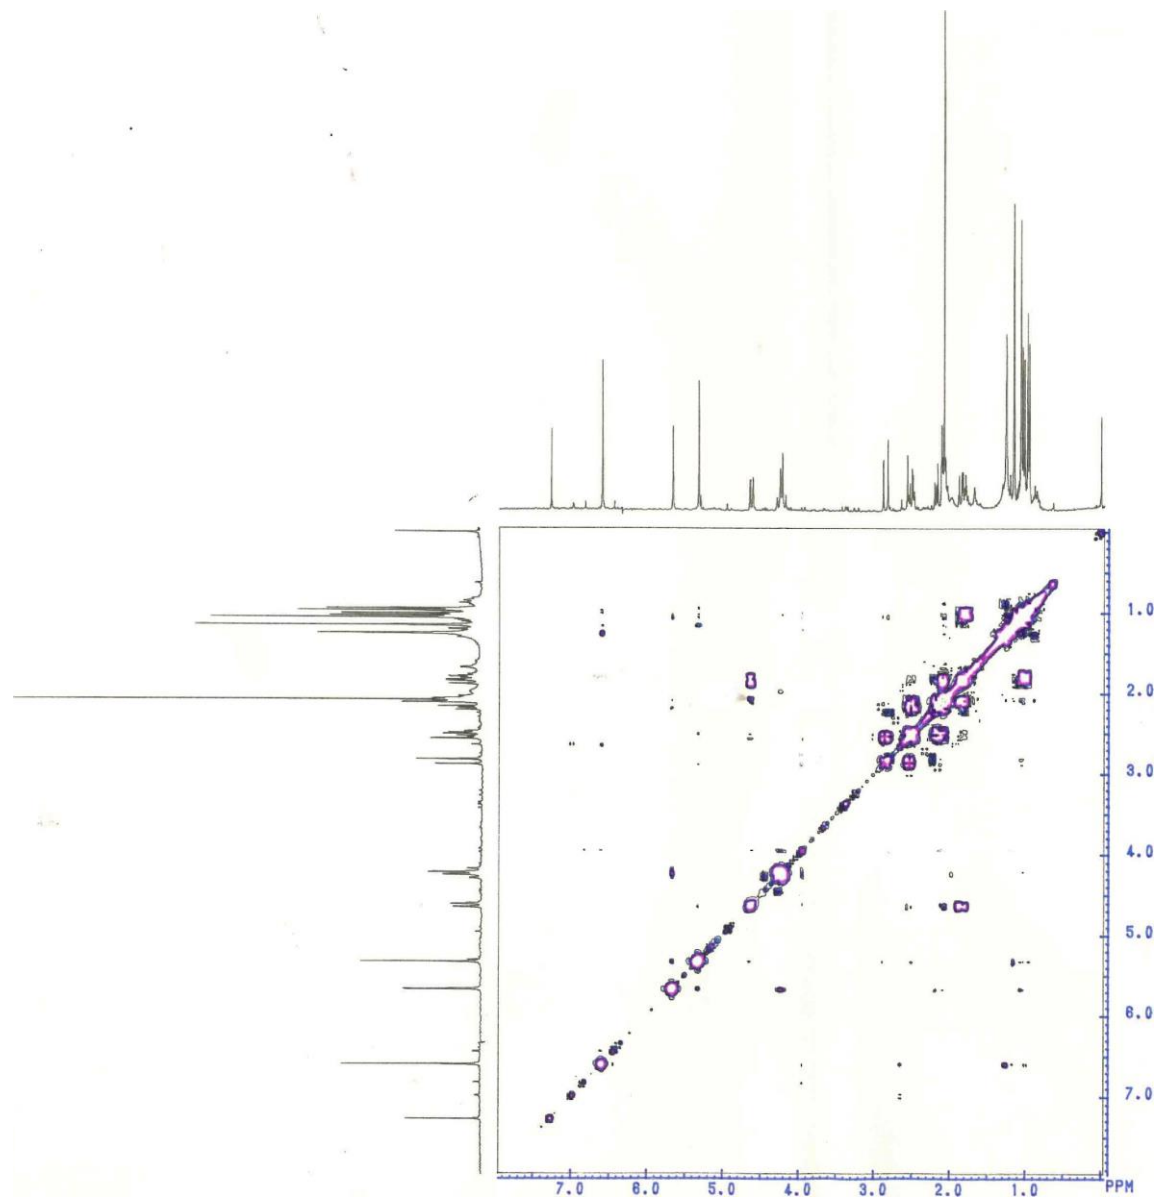

**S24. COSY spectrum of Tricholomalide G (29).**

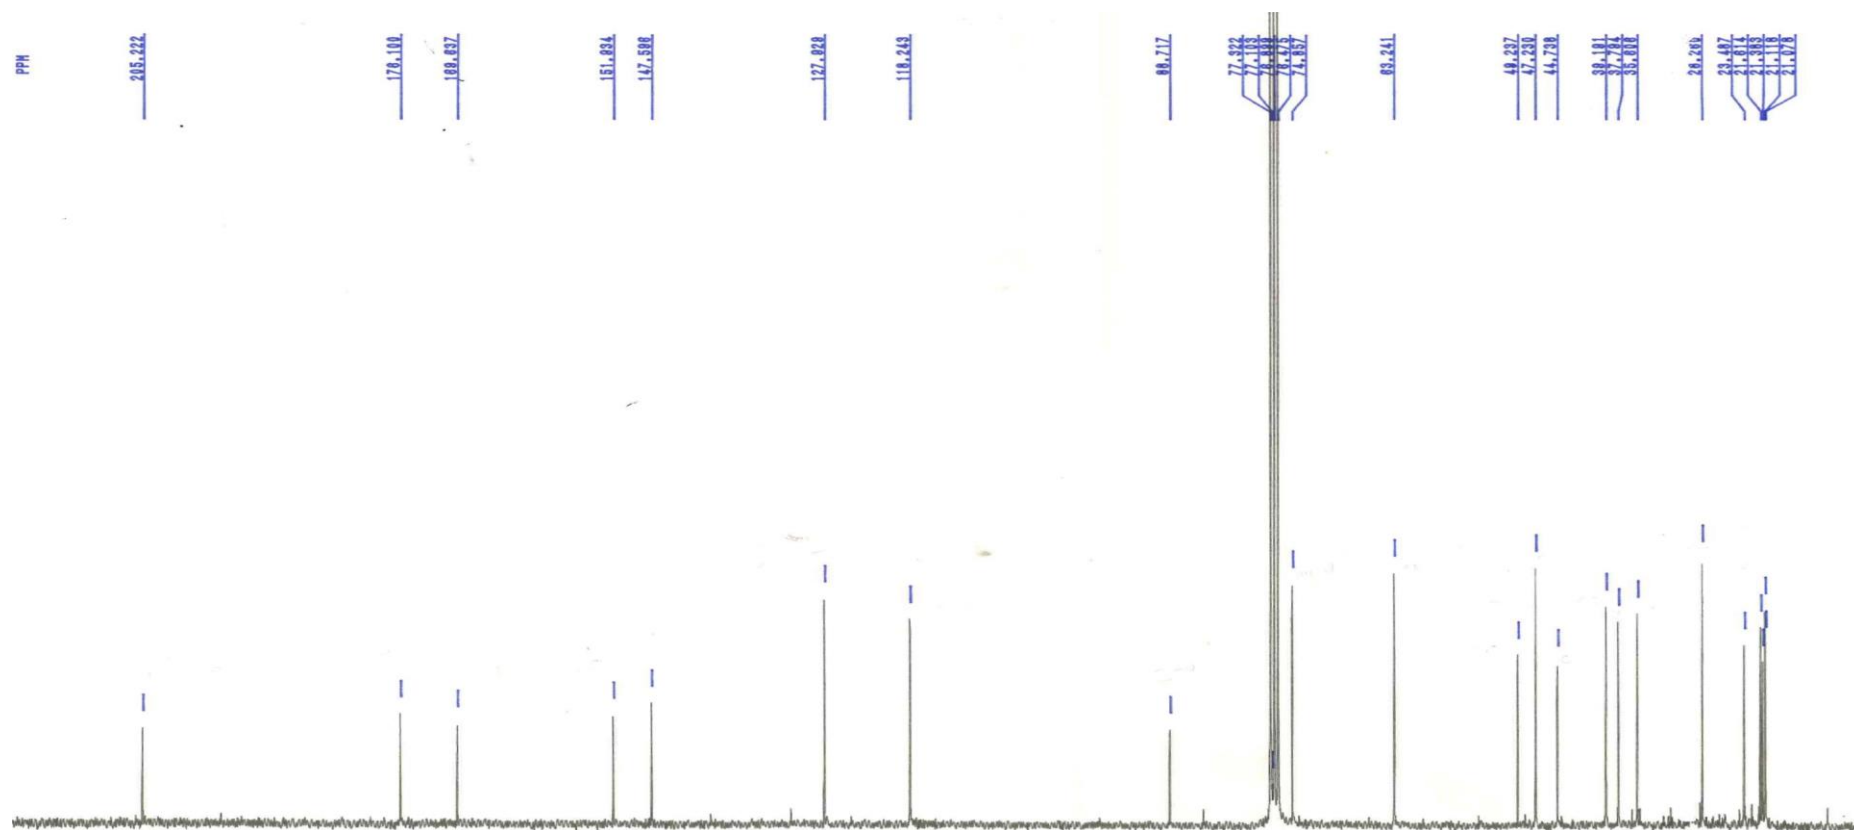

**S25.**  $^{13}\text{C}$  NMR spectrum of Tricholomalide G (29).

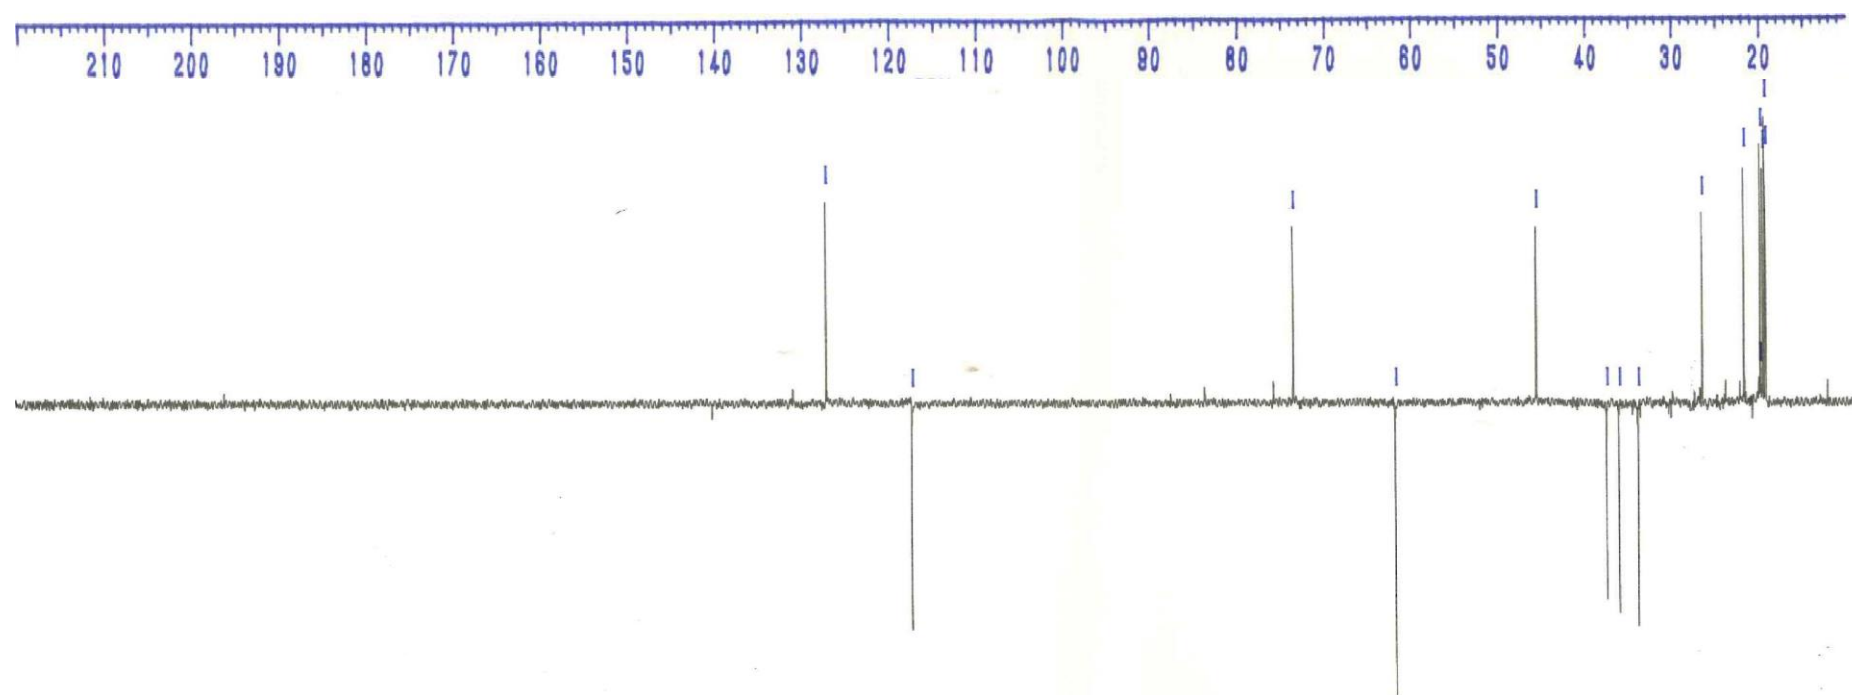

**S26. DEPT  $^{13}\text{C}$  NMR spectrum of Tricholomalide G (29).**

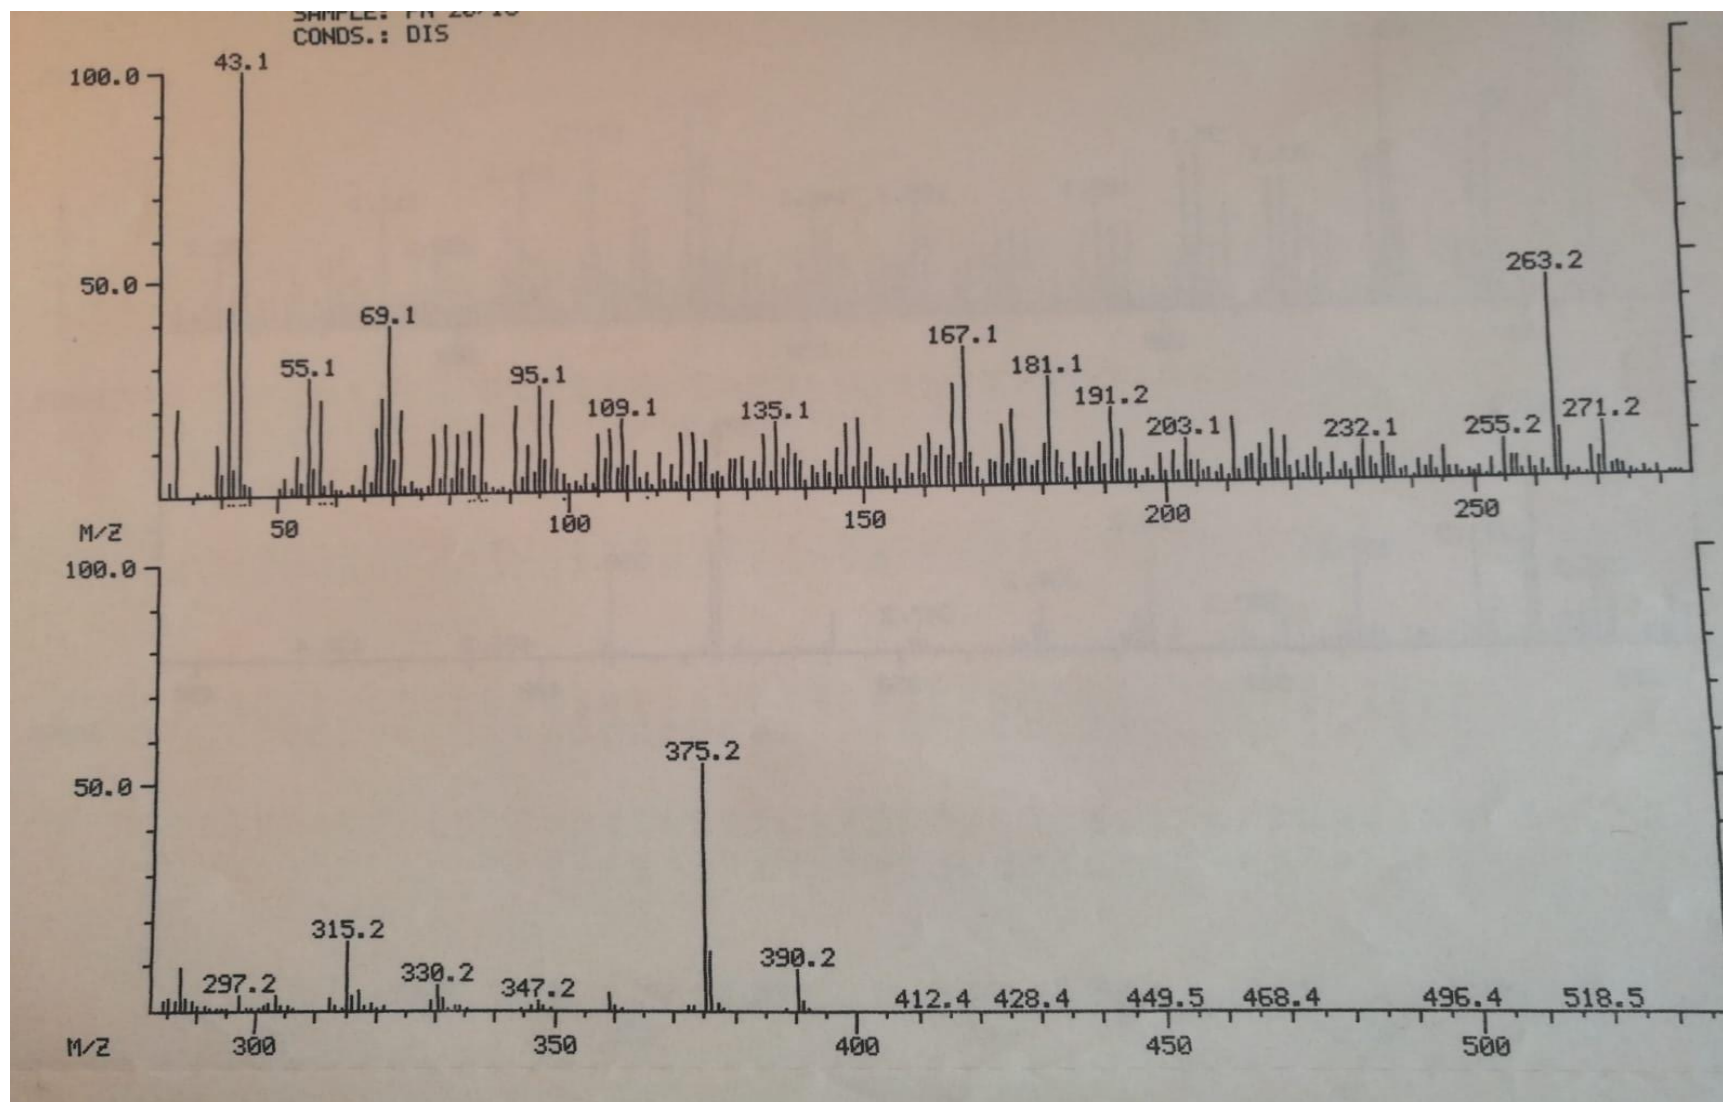

**S27. EIMS spectrum of Tricholomalide G (29).**

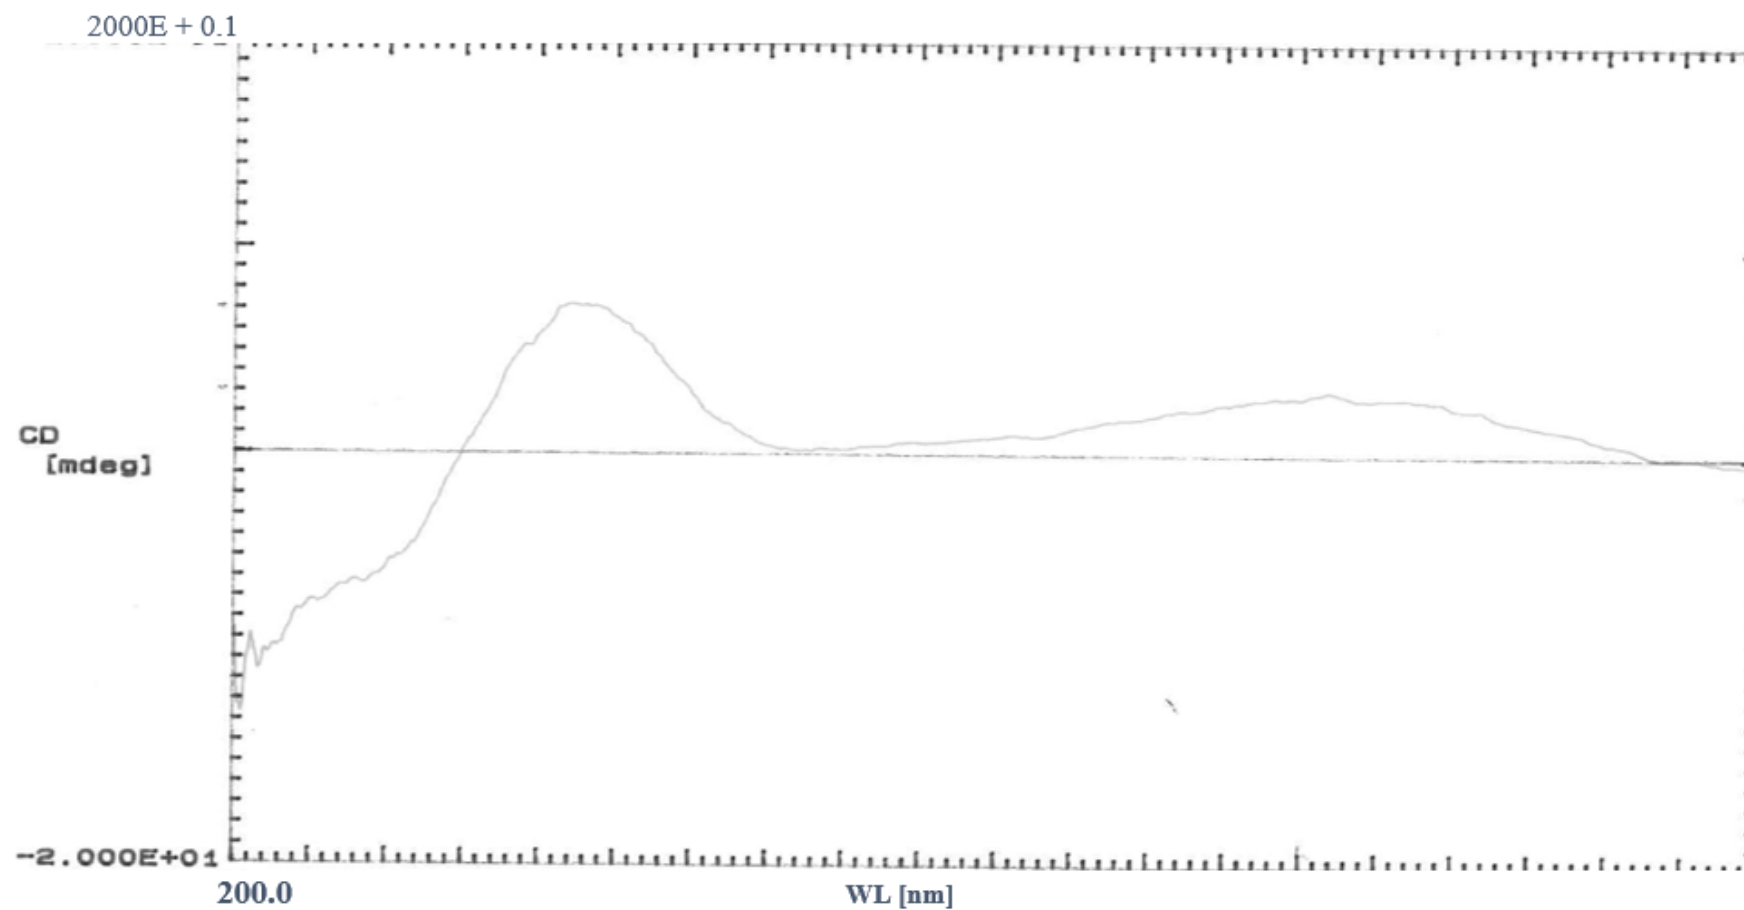

**S28. CD spectrum of Tricholomalide G (29).**

**S29. Table S1.** NMR spectral data for compounds **26**, **27**, and **29** in CDCl<sub>3</sub>.

| C/H               | 26                                                    |                                  | 27                                                    |                                  | 29                                              |                                  |
|-------------------|-------------------------------------------------------|----------------------------------|-------------------------------------------------------|----------------------------------|-------------------------------------------------|----------------------------------|
|                   | $\delta_{\text{H}^{\text{a,b}}}$                      | $\delta_{\text{C}^{\text{c,d}}}$ | $\delta_{\text{H}^{\text{a,b}}}$                      | $\delta_{\text{C}^{\text{c,d}}}$ | $\delta_{\text{H}^{\text{a,b}}}$                | $\delta_{\text{C}^{\text{c,d}}}$ |
| 1                 | 6.63 (1H, s)                                          | 125.9 d                          | 6.65 (1H, s)                                          | 126.5 d                          | 6.58 (1H, s)                                    | 128.0 d                          |
| 2                 | –                                                     | 87.4 s                           | –                                                     | 87.4 s                           | –                                               | 88.8 s                           |
| 3                 | –                                                     | 148.6 s                          | –                                                     | 148.8 s                          | –                                               | 147.7 s                          |
| 4                 | 9.70 (1H, s)                                          | 191.8, d                         | 9.70 (1H, s)                                          | 192.2, d                         | 4.22 (1H, dd, 13.0, 1.1)<br>4.27 (1H, br d, 13) | 63.3 t                           |
| 5                 | –                                                     | 175.2 s                          | –                                                     | 176.0 s                          | –                                               | 176.2 s                          |
| 6                 | 2.29 (1H, dd, 18.5, 1.0)<br>2.88 (1H, d, 18.5)        | 35.3 t                           | 2.16 (1H, dd, 18.5, 1.0)<br>2.91 (1H, d, 18.5)        | 33.9 t                           | 2.53 (1H, dd, 18.0, 1.0)<br>2.85 (1H, d, 18.0)  | 35.7 t                           |
| 7                 | –                                                     | 49.8 s                           | –                                                     | 50.7 s                           | –                                               | 49.3 s                           |
| 8                 | 4.72 (1H, ddd, 11.5, 2.0, 1.0)                        | 74.4 d                           | 3.63 (1H, br d, 11.5)                                 | 71.6 d                           | 4.63 (1H, ddd, 11.5, 2.0, 0.8)                  | 75.0 d                           |
| 9                 | 1.79 (1H, dd, 15.0, 11.5)<br>2.15 (1H, dd, 15.0, 2.0) | 37.7 t                           | 1.85 (1H, dd, 15.5, 11.5)<br>2.15 (1H, dd, 15.5, 2.0) | 41.1 t                           | 1.84 (1H, dd, 15.5, 11.5)<br>2.02-2.20 (1H, m)  | 37.9 t                           |
| 10                | –                                                     | 44.7 s                           | –                                                     | 44.5 s                           | –                                               | 44.8 s                           |
| 11                | –                                                     | 151.3 s                          | –                                                     | 150.7 s                          | –                                               | 152.0 s                          |
| 12                | –                                                     | 205.0 s                          | –                                                     | 205.01 s                         | –                                               | 205.3 s                          |
| 13                | 2.1-2.2 (1H, m)<br>2.45-2.57 (1H, m)                  | 38.9 t                           | 2.14 (1H, dd, 19, 12)<br>2.49 (1H, dd, 19, 8)         | 39.4 t                           | 2.05-2.18 (1H, m)<br>2.47-2.57 (1H, m)          | 39.3 t                           |
| 14                | 2.1-2.2 (1H, m)                                       | 47.2 d                           | 1.85-1.92 (1H, m)                                     | 49.0 d                           | 2.1-2.2 (1H, m)                                 | 47.3 d                           |
| 15                | 1.75-1.85 (1H, m)                                     | 28.3 d                           | 1.75-1.85 (1H, m)                                     | 28.6 d                           | 1.75-1.88 (1H, m)                               | 28.4 d                           |
| 16                | 1.02 (3H, d, 6.5)                                     | 23.6 q                           | 1.10 (3H, d, 6.5)                                     | 24.1 <sup>e</sup> q              | 1.02 (3H, d, 6.5)                               | 23.6 q                           |
| 17                | 0.95 (3H, d, 6.5)                                     | 21.6 q                           | 0.99 (3H, d, 6.5)                                     | 21.9 q                           | 0.96 (3H, d, 6.5)                               | 21.7 q                           |
| 18                | 1.12 (3H, s)                                          | 21.4 q                           | 1.09 (3H, s)                                          | 21.6 q                           | 1.16 (3H, s)                                    | 21.5 q                           |
| 19                | 0.98 (3H, s)                                          | 22.4 q                           | 1.15 (3H, s)                                          | 22.7 <sup>e</sup> q              | 1.06 (3H, s)                                    | 21.2 q                           |
| 20                | 6.41 (1H, br s)<br>6.62 (1H, br s)                    | 138.4 t                          | 6.41 (1H, s)<br>6.63 (1H, s)                          | 138.5 t                          | 5.32 (1H, s)<br>5.67 (1H, t, 1.1)               | 118.3 t                          |
| COCH <sub>3</sub> | –                                                     | 169.4 s                          | –                                                     | –                                | –                                               | 169.7 s                          |
| COCH <sub>3</sub> | –                                                     | 21.1 q                           | –                                                     | –                                | –                                               | 21.2 q                           |
| COCH <sub>3</sub> | 2.07 (3H, s)                                          | –                                | –                                                     | –                                | 2.08 (3H, s)                                    | –                                |

<sup>a</sup> 300MHz; <sup>b</sup> the chemical shift of the protons attached to each carbon was established by HETCOR cross peaks; <sup>c</sup> 75 MHz; <sup>d</sup> carbon multiplicities were established by DEPT experiments;

<sup>e</sup> the assignments can be interchanged.

**S30. Table S2.** NMR spectral data for compound **28** in CDCl<sub>3</sub>.

| C/H | $\delta_{\text{H}}^{\text{a,b}}$                                       | $\delta_{\text{C}}^{\text{c,d}}$ | C/H   | $\delta_{\text{H}}^{\text{a,b}}$                      | $\delta_{\text{C}}^{\text{c,d}}$ |
|-----|------------------------------------------------------------------------|----------------------------------|-------|-------------------------------------------------------|----------------------------------|
| 1   | 6.97 (1H, d, 1.0)                                                      | 131.8 d                          | 12    | –                                                     | 205.8 s                          |
| 2   | –                                                                      | 76.1 s                           | 13    | 2.19 (1H, dd, 19.0, 12.5)<br>2.50 (1H, dd, 19.0, 8.0) | 39.3 t                           |
| 3   | –                                                                      | 148.6 s                          | 14    | 1.75–1.85 (1H, m)                                     | 47.5 d                           |
| 4   | 9.55 (1H, s)                                                           | 196.3 d                          | 15    | 1.75–1.92 (1H, m)                                     | 28.6 d                           |
| 5   | –                                                                      | 175.3 s                          | 16    | 1.11 (3H, q, 6.5)                                     | 24.1 q                           |
| 6   | $\beta$ 1.86 (1H, d, 17.0)<br>$\alpha$ 3.24 (1H, dd, 17.0, 1.0)        | 35.5 t                           | 17    | 0.98 (3H, q, 6.5)                                     | 21.8 q                           |
| 7   | –                                                                      | 48.6 s                           | 18    | 1.20 (3H, s)                                          | 21.9 q                           |
| 8   | 3.92 (1H, dd, 12.8, 2.5)                                               | 85.0 d                           | 19    | 0.97 (3H, br s)                                       | 25.8 q                           |
| 9   | $\beta$ 2.23 (1H, dd, 14.0, 2.5)<br>$\alpha$ 2.79 (1H, dd, 14.0, 12.8) | 36.4 t                           | 20    | 6.45 (1H, s)<br>6.82 (1H, s)                          | 140.6 t                          |
| 10  | –                                                                      | 44.5 s                           | 2'-OH | 4.92 (1H, d, 1.0)                                     | –                                |
| 11  | –                                                                      | 149.7 s                          |       |                                                       |                                  |

<sup>a</sup>300MHz; <sup>b</sup>the chemical shift of the protons attached to each carbon was established by HETCOR cross peaks; <sup>c</sup>75 MHz; <sup>d</sup>carbon multiplicities were established by DEPT experiments.
